# Supplementary material for: Comparative Transcriptome Analysis of Bt Resistant and Susceptible Strains in Ostrinia furnacalis (Guenée) (Lepidoptera: Crambidae)
Source: MDPI journal article supplement (doi:10.3390/agriculture12020298), 2022-02-19
Supplement: s1 [file s1]

# Supplementary Tables

**Table S1 Primers used for RT-qPCR experiment**

| Gene ID        | Gene   | Primer  | Primer Sequences      | Product size |
|----------------|--------|---------|-----------------------|--------------|
| ncbi_114357739 | UDP    | Forward | ACCTTGGTGGGATGCATCAG  | 223          |
|                |        | Reverse | GGAGTGCGTCCAGGTAGTTC  |              |
| ncbi_114355278 | ABCG1u | Forward | CGGACACCAGCCACCATATT  | 151          |
|                |        | Reverse | ATATCACGGTGCCCATCGAC  |              |
| ncbi_114360773 | GST1   | Forward | ACGCTCTGTACCCAACTGAC  | 204          |
|                |        | Reverse | ACGGTGAGACTGAAGCCAAG  |              |
| ncbi_114356024 | ABCG1d | Forward | GTTGGGCCTTCTAGTTGGTTC | 170          |
|                |        | Reverse | AGAGTCCGTAGCGGAGGTAT  |              |
| ncbi_114363214 | ABCA2  | Forward | TAGCGACTGCAGCATACGAG  | 225          |
|                |        | Reverse | CGGCTAACGAAGTGGCAATG  |              |
| ncbi_114361254 | ABCG4  | Forward | GGAAAGGGGGAGATCATAGA  | 149          |
|                |        | Reverse | ACCCTGTGGTAGGTTTCATCA |              |
| ncbi_114362710 | MBALP  | Forward | TTTGAGGAAAAACGCAGCCG  | 230          |
|                |        | Reverse | TCCACGAACAGGAAGAAGCC  |              |
| ncbi_114354725 | HSP68  | Forward | CGTGTGTTGGAGTTTGGCAG  | 201          |
|                |        | Reverse | TCTTCGGGTCGTGCAACTTG  |              |
| ncbi_114349629 | PNLIP  | Forward | ACGCTGGATTGTCAGACTGG  | 197          |
|                |        | Reverse | AGTGTGGATCGCTTCAACGT  |              |

**Table S2 A subset of the differentially expressed genes up- or down-regulated in ACB-IeR or –FR compared with ACB-BtS strain.**

| Gene ID        | Description                                                                     | log2(fc) (FDR)  | log2(fc) (FDR)  |
|----------------|---------------------------------------------------------------------------------|-----------------|-----------------|
| Cadherin       |                                                                                 | ACB-IeR         | ACB-FR          |
| MSTRG.22659    | LOW QUALITY PROTEIN: cadherin-99C-like [ <i>Ctenocephalides felis</i> ]         | +0.14(8.42e-01) | +0.23(7.48e-01) |
| MSTRG.7252     | Cadherin EGF LAG seven-pass G-type receptor 1 [ <i>Papilio machaon</i> ]        | -1.82(1.00e+00) | -9.42(1.00e+00) |
| ncbi_114350636 | protocadherin Fat 3-like isoform X1 [ <i>Bicyclus anynana</i> ]                 | +0.21(4.44e-01) | -0.53(4.07e-01) |
| ncbi_114350637 | protocadherin Fat 3-like isoform X1 [ <i>Bicyclus anynana</i> ]                 | -0.17(9.18e-01) | -0.48(1.24e-01) |
| ncbi_114350687 | cadherin EGF LAG seven-pass G-type receptor 2 [ <i>Ostrinia furnacalis</i> ]    | +0.00(1.00e+00) | +0.00(1.00e+00) |
| ncbi_114351342 | fat-like cadherin-related tumor suppressor homolog [ <i>Spodoptera litura</i> ] | -0.59(8.80e-01) | -1.66(2.83e-01) |
| ncbi_114351362 | fat-like cadherin-related tumor suppressor homolog [ <i>Spodoptera litura</i> ] | -0.17(9.83e-01) | -0.90(2.81e-01) |
| ncbi_114352029 | neural-cadherin-like isoform X1 [ <i>Ostrinia furnacalis</i> ]                  | +0.00(1.00e+00) | +3.74(1.00e+00) |
| ncbi_114352171 | cadherin-86C isoform X1 [ <i>Ostrinia furnacalis</i> ]                          | -3.17(1.00e+00) | -0.85(1.00e+00) |
| ncbi_114353392 | cadherin [ <i>Ostrinia nubilalis</i> ]                                          | +0.57(3.31e-02) | -0.74(8.85e-02) |
| ncbi_114353394 | protocadherin Fat 1-like [ <i>Ostrinia furnacalis</i> ]                         | -0.09(9.56e-01) | -0.10(9.64e-01) |
| ncbi_114355216 | fat-like cadherin-related tumor suppressor homolog [ <i>Spodoptera litura</i> ] | -3.20(3.28e-02) | -1.17(1.04e-06) |
| ncbi_114355389 | fat-like cadherin-related tumor suppressor homolog [ <i>Spodoptera litura</i> ] | -1.69(2.66e-01) | -1.12(5.28e-01) |
| ncbi_114355497 | cadherin-related tumor suppressor [ <i>Ostrinia furnacalis</i> ]                | -1.46(5.43e-01) | -1.87(2.31e-01) |
| ncbi_114355663 | fat-like cadherin-related tumor suppressor homolog [ <i>Spodoptera litura</i> ] | -1.02(7.36e-01) | -0.97(6.48e-01) |
| ncbi_114355667 | fat-like cadherin-related tumor suppressor homolog [ <i>Spodoptera litura</i> ] | -1.05(2.97e-01) | -0.97(2.48e-01) |
| ncbi_114355939 | Mutant cadherin [ <i>Operophtera brumata</i> ]                                  | +0.70(3.61e-01) | +1.32(1.59e-02) |
| ncbi_114355983 | Mutant cadherin [ <i>Operophtera brumata</i> ]                                  | -0.61(4.15e-01) | -0.11(9.77e-01) |
| ncbi_114356045 | fat-like cadherin-related tumor suppressor homolog [ <i>Spodoptera litura</i> ] | +4.06(1.00e+00) | +5.64(1.00e+00) |
| ncbi_114356126 | cadherin-23 [ <i>Ostrinia furnacalis</i> ]                                      | -2.46(1.21e-01) | -1.70(3.16e-01) |
| ncbi_114356128 | Cadherin-23 [ <i>Papilio machaon</i> ]                                          | +0.00(1.00e+00) | +0.00(1.00e+00) |
| ncbi_114356360 | LOW QUALITY PROTEIN: fat-like cadherin-related tumor suppressor homolog         | -0.07(9.71e-01) | -0.04(9.68e-01) |

|                |                                                                                 |                 |                 |
|----------------|---------------------------------------------------------------------------------|-----------------|-----------------|
|                | [ <i>Ostrinia furnacalis</i> ]                                                  |                 |                 |
| ncbi_114356615 | cadherin-23 [ <i>Ostrinia furnacalis</i> ]                                      | -0.53(5.29e-01) | -0.35(6.96e-01) |
| ncbi_114357327 | fat-like cadherin-related tumor suppressor homolog [ <i>Spodoptera litura</i> ] | -2.27(1.10e-01) | +0.08(9.19e-01) |
| ncbi_114357759 | cadherin-24-like [ <i>Ostrinia furnacalis</i> ]                                 | +0.00(1.00e+00) | +0.00(1.00e+00) |
| ncbi_114358153 | Mutant cadherin [Operophtera brumata]                                           | +0.00(1.00e+00) | +5.32(1.00e+00) |
| ncbi_114358900 | protocadherin-like wing polarity protein stan [ <i>Ostrinia furnacalis</i> ]    | -1.32(4.21e-02) | -0.64(4.42e-01) |
| ncbi_114359978 | neural-cadherin-like isoform X1 [ <i>Ostrinia furnacalis</i> ]                  | -2.58(1.00e+00) | -4.32(1.00e+00) |
| ncbi_114360023 | Protocadherin Fat 1 [ <i>Papilio machaon</i> ]                                  | -0.26(1.00e+00) | -0.82(8.39e-01) |
| ncbi_114360982 | cadherin-87A-like, partial [ <i>Ostrinia furnacalis</i> ]                       | +2.46(1.00e+00) | +3.39(1.00e+00) |
| ncbi_114361932 | Cadherin-related tumor suppressor [ <i>Papilio machaon</i> ]                    | -0.24(1.00e+00) | -0.83(1.00e+00) |
| ncbi_114362503 | protocadherin Fat 3-like isoform X1 [Bicyclus anynana]                          | -0.03(7.74e-01) | -0.38(1.51e-01) |
| ncbi_114362562 | DE-cadherin [ <i>Ostrinia furnacalis</i> ]                                      | +0.03(7.52e-01) | +0.07(7.72e-01) |
| ncbi_114362815 | fat-like cadherin-related tumor suppressor homolog [ <i>Spodoptera litura</i> ] | +0.73(7.80e-01) | -0.98(1.00e+00) |
| ncbi_114362981 | fat-like cadherin-related tumor suppressor homolog [ <i>Spodoptera litura</i> ] | -0.79(8.39e-01) | -0.32(9.72e-01) |
| ncbi_114363449 | Mutant cadherin, partial [Operophtera brumata]                                  | +4.54(1.00e+00) | +0.00(1.00e+00) |
| ncbi_114363888 | cadherin-87A-like, partial [ <i>Ostrinia furnacalis</i> ]                       | +1.58(1.00e+00) | +3.21(1.00e+00) |
| ncbi_114364807 | cadherin-89D [ <i>Ostrinia furnacalis</i> ]                                     | -4.06(1.00e+00) | -4.06(1.00e+00) |
| ncbi_114365074 | Mutant cadherin [Operophtera brumata]                                           | +7.67(1.00e+00) | +7.54(1.00e+00) |
| ncbi_114365286 | fat-like cadherin-related tumor suppressor homolog [ <i>Spodoptera litura</i> ] | +0.53(8.10e-01) | -1.33(1.00e+00) |
| ncbi_114365466 | Mutant cadherin [Operophtera brumata]                                           | +0.90(6.01e-01) | +1.47(2.26e-01) |
| ncbi_114365945 | cadherin-99C, partial [ <i>Ostrinia furnacalis</i> ]                            | +1.49(5.72e-01) | -0.81(1.00e+00) |
| ncbi_114366173 | fat-like cadherin-related tumor suppressor homolog [ <i>Spodoptera litura</i> ] | -0.92(2.60e-01) | -1.80(1.71e-03) |
| ncbi_114366269 | cadherin-99C-like [ <i>Ostrinia furnacalis</i> ]                                | +1.43(4.05e-01) | -0.05(9.98e-01) |
| ncbi_114366536 | fat-like cadherin-related tumor suppressor homolog [ <i>Spodoptera litura</i> ] | +0.12(1.00e+00) | -2.13(1.00e+00) |
| <b>ABC</b>     |                                                                                 |                 |                 |

|                |                                                                                                      |                 |                 |
|----------------|------------------------------------------------------------------------------------------------------|-----------------|-----------------|
| ncbi_114366205 | ABC transporter G family member 20-like, partial [ <i>Ostrinia furnacalis</i> ]                      | -0.25(9.41e-01) | -1.61(1.52e-01) |
| ncbi_114351228 | PREDICTED: DNA-directed RNA polymerases I, II, and III subunit RPABC1 [ <i>Papilio xuthus</i> ]      | +0.05(7.63e-01) | +0.38(1.69e-01) |
| ncbi_114351209 | ABC transporter G family member 23-like isoform X1 [ <i>Ostrinia furnacalis</i> ]                    | -0.87(6.57e-01) | -1.63(2.25e-01) |
| ncbi_114353021 | DNA-directed RNA polymerases I, II, and III subunit RPABC3 [ <i>Ostrinia furnacalis</i> ]            | +0.11(6.48e-01) | +0.28(3.30e-01) |
| ncbi_114364630 | DNA-directed RNA polymerases I, II, and III subunit RPABC2 [ <i>Ostrinia furnacalis</i> ]            | +0.33(2.89e-01) | +0.24(3.54e-01) |
| ncbi_114366330 | ABC transporter G family member 23 isoform X1 [ <i>Ostrinia furnacalis</i> ]                         | -0.33(9.18e-01) | -0.63(6.11e-01) |
| ncbi_114365778 | DNA-directed RNA polymerases I, II, and III subunit RPABC4 [ <i>Ostrinia furnacalis</i> ]            | -0.97(4.41e-01) | -0.59(6.24e-01) |
| ncbi_114366309 | ABC transporter G family member 20-like [ <i>Ostrinia furnacalis</i> ]                               | -1.53(4.91e-01) | -0.98(6.81e-01) |
| ncbi_114351142 | ABC transporter G family member 20 isoform X1 [ <i>Ostrinia furnacalis</i> ]                         | -1.20(3.72e-01) | -0.47(7.75e-01) |
| ncbi_114353871 | ABC transporter G family member 7-like [ <i>Trichoplusia ni</i> ]                                    | -0.79(1.00e+00) | -0.55(8.91e-01) |
| ncbi_114352409 | DNA-directed RNA polymerases I, II, and III subunit RPABC5 [ <i>Melipona quadrifasciata</i> ]        | +0.02(9.23e-01) | -0.10(9.96e-01) |
| ncbi_114362695 | Excinuclease ABC, A subunit, partial [ <i>Operophtera brumata</i> ]                                  | -0.81(1.00e+00) | -3.54(1.00e+00) |
| ncbi_114365993 | ABC transporter A family member 4-like [ <i>Ostrinia furnacalis</i> ]                                | +4.32(1.00e+00) | +2.74(1.00e+00) |
| ncbi_114358164 | ABC-type transporter, integral membrane subunit [ <i>Operophtera brumata</i> ]                       | +0.00(1.00e+00) | +4.74(1.00e+00) |
| ncbi_114350490 | phospholipid-transporting ATPase ABCA7 isoform X3 [ <i>Galleria mellonella</i> ]                     | +0.00(1.00e+00) | +0.00(1.00e+00) |
| ncbi_114357341 | ABC transporter ATP-binding protein, partial [ <i>Operophtera brumata</i> ]                          | +0.00(1.00e+00) | +0.00(1.00e+00) |
| ncbi_114358663 | ABC transporter permease [ <i>Operophtera brumata</i> ]                                              | +0.00(1.00e+00) | +0.00(1.00e+00) |
| ncbi_114363764 | Multidrug resistance ABC transporter ATP-binding and permease protein [ <i>Operophtera brumata</i> ] | +0.00(1.00e+00) | +0.00(1.00e+00) |
| <b>ALP</b>     |                                                                                                      |                 |                 |
| ncbi_114352782 | membrane-bound alkaline phosphatase-like [ <i>Ostrinia furnacalis</i> ]                              | -0.32(1.00e+00) | +0.49(1.00e+00) |
| ncbi_114355041 | alkaline phosphatase, tissue-nonspecific isozyme-like isoform X1 [ <i>Ostrinia furnacalis</i> ]      | -0.06(9.81e-01) | +0.36(8.39e-01) |
| ncbi_114355045 | alkaline phosphatase, tissue-nonspecific isozyme-like [ <i>Ostrinia furnacalis</i> ]                 | +4.74(1.00e+00) | +6.20(1.00e+00) |

|                |                                                                                    |                 |                 |
|----------------|------------------------------------------------------------------------------------|-----------------|-----------------|
| ncbi_114355362 | alkaline phosphatase [ <i>Ostrinia furnacalis</i> ]                                | -0.20(7.66e-01) | -0.13(9.14e-01) |
| ncbi_114355386 | Alkaline phosphatase, tissue-nonspecific isozyme [ <i>Papilio machaon</i> ]        | +0.56(1.00e+00) | -1.09(1.00e+00) |
| ncbi_114356329 | alkaline phosphatase-like [ <i>Ostrinia furnacalis</i> ]                           | +0.00(1.00e+00) | +0.00(1.00e+00) |
| ncbi_114362708 | membrane-bound alkaline phosphatase-like isoform X1 [ <i>Ostrinia furnacalis</i> ] | -0.28(6.93e-01) | -0.03(9.25e-01) |
| ncbi_114362709 | membrane-bound alkaline phosphatase-like [ <i>Ostrinia furnacalis</i> ]            | -0.33(4.05e-01) | +0.05(6.53e-01) |
| ncbi_114362710 | membrane-bound alkaline phosphatase-like [ <i>Ostrinia furnacalis</i> ]            | -1.37(5.77e-04) | -0.14(9.87e-01) |
| <b>APN</b>     |                                                                                    |                 |                 |
| ncbi_114361315 | membrane alanyl aminopeptidase-like [ <i>Ostrinia furnacalis</i> ]                 | +0.41(6.80e-06) | +0.54(2.37e-06) |
| ncbi_114353834 | methionine aminopeptidase 2 [ <i>Ostrinia furnacalis</i> ]                         | -0.06(9.16e-01) | +0.35(1.84e-02) |
| ncbi_114361548 | membrane alanyl aminopeptidase-like isoform X1 [ <i>Ostrinia furnacalis</i> ]      | +0.01(5.77e-01) | +0.26(3.26e-02) |
| ncbi_114361563 | membrane alanyl aminopeptidase-like [ <i>Ostrinia furnacalis</i> ]                 | +0.03(4.75e-01) | +0.20(1.11e-01) |
| ncbi_114365886 | methionine aminopeptidase 1, partial [ <i>Ostrinia furnacalis</i> ]                | -0.30(6.61e-01) | +0.27(1.56e-01) |
| ncbi_114361414 | aminopeptidase N-like [ <i>Ostrinia furnacalis</i> ]                               | -0.05(9.10e-01) | +0.14(1.75e-01) |
| ncbi_114365560 | xaa-Pro aminopeptidase 3-like [ <i>Ostrinia furnacalis</i> ]                       | +0.37(2.12e-01) | +0.38(2.06e-01) |
| ncbi_114361386 | Membrane alanyl aminopeptidase [ <i>Papilio xuthus</i> ]                           | -0.04(7.74e-01) | +0.12(2.07e-01) |
| ncbi_114361449 | membrane alanyl aminopeptidase-like [ <i>Ostrinia furnacalis</i> ]                 | -0.23(7.71e-01) | +0.13(4.07e-01) |
| ncbi_114361372 | aminopeptidase N3c [ <i>Ostrinia nubilalis</i> ]                                   | -0.69(1.48e-01) | -0.33(5.20e-01) |
| ncbi_114350973 | leucyl-cystinyl aminopeptidase-like isoform X1 [ <i>Ostrinia furnacalis</i> ]      | +0.04(8.23e-01) | -0.36(5.57e-01) |
| ncbi_114353229 | xaa-Pro aminopeptidase ApepP-like isoform X1 [ <i>Ostrinia furnacalis</i> ]        | -0.11(9.84e-01) | -0.21(7.97e-01) |
| ncbi_114356040 | dipeptidyl aminopeptidase-like protein 6 [ <i>Ostrinia furnacalis</i> ]            | -0.51(9.33e-01) | -0.74(8.21e-01) |
| ncbi_114361949 | glutamyl aminopeptidase-like isoform X1 [ <i>Ostrinia furnacalis</i> ]             | +0.03(7.26e-01) | -0.19(8.43e-01) |
| ncbi_114365491 | cytosol aminopeptidase-like [ <i>Ostrinia furnacalis</i> ]                         | -0.38(9.31e-01) | -0.47(8.70e-01) |
| ncbi_114366310 | aminopeptidase N-like [ <i>Ostrinia furnacalis</i> ]                               | +0.48(3.72e-01) | +0.08(8.88e-01) |
| ncbi_114361327 | aminopeptidase N-like [ <i>Ostrinia furnacalis</i> ]                               | -0.17(9.83e-01) | -0.30(8.96e-01) |
| ncbi_114363130 | probable aminopeptidase NPEPL1 isoform X4 [ <i>Ostrinia furnacalis</i> ]           | +0.02(7.31e-01) | -0.14(9.35e-01) |

|                |                                                                                                |                 |                 |
|----------------|------------------------------------------------------------------------------------------------|-----------------|-----------------|
| MSTRG.22364    | xaa-Pro aminopeptidase 1-like [ <i>Centruroides sculpturatus</i> ]                             | -0.79(8.50e-01) | -0.27(9.44e-01) |
| ncbi_114361393 | aminopeptidase N-like isoform X2 [ <i>Ostrinia furnacalis</i> ]                                | -0.81(6.24e-01) | +0.14(9.51e-01) |
| ncbi_114350952 | xaa-Pro aminopeptidase 3-like, partial [ <i>Ostrinia furnacalis</i> ]                          | +0.42(7.03e-01) | +0.06(9.54e-01) |
| ncbi_114353253 | xaa-Pro aminopeptidase ApepP-like isoform X1 [ <i>Ostrinia furnacalis</i> ]                    | -0.13(9.95e-01) | -0.12(9.58e-01) |
| ncbi_114361540 | membrane alanyl aminopeptidase-like [ <i>Ostrinia furnacalis</i> ]                             | -0.22(7.32e-01) | -0.09(9.61e-01) |
| ncbi_114361612 | puromycin-sensitive aminopeptidase isoform X1 [ <i>Ostrinia furnacalis</i> ]                   | +0.04(7.24e-01) | -0.10(9.66e-01) |
| ncbi_114361404 | membrane alanyl aminopeptidase-like [ <i>Ostrinia furnacalis</i> ]                             | +0.29(2.42e-02) | -0.06(9.82e-01) |
| ncbi_114365752 | methionine aminopeptidase 1D, mitochondrial isoform X1 [ <i>Ostrinia furnacalis</i> ]          | -0.14(9.81e-01) | -0.08(9.93e-01) |
| ncbi_114350764 | aminopeptidase N isoform X1 [ <i>Ostrinia furnacalis</i> ]                                     | +0.00(1.00e+00) | -0.51(1.00e+00) |
| ncbi_114361861 | xaa-Pro aminopeptidase 1 [ <i>Ostrinia furnacalis</i> ]                                        | -0.49(1.00e+00) | -2.22(1.00e+00) |
| ncbi_114362805 | glutamyl aminopeptidase-like isoform X4 [ <i>Ostrinia furnacalis</i> ]                         | +0.00(1.00e+00) | +0.00(1.00e+00) |
| ncbi_114365049 | cytosol aminopeptidase-like, partial [ <i>Ostrinia furnacalis</i> ]                            | +0.00(1.00e+00) | +0.00(1.00e+00) |
| <b>Others</b>  |                                                                                                |                 |                 |
| MSTRG.14142    | UDP-glucuronosyltransferase 2B15-like [ <i>Ostrinia furnacalis</i> ]                           | +1.44(6.34e-05) | +2.31(8.21e-13) |
| MSTRG.14366    | PREDICTED: nuclear transcription factor Y subunit gamma-like [ <i>Amyeloidis transitella</i> ] | +2.03(1.21e-07) | +2.46(1.59e-09) |
| MSTRG.23526    | retinol dehydrogenase 14-like [ <i>Vanessa tameamea</i> ]                                      | -1.00(7.05e-03) | +0.87(7.28e-03) |
| ncbi_114349629 | pancreatic triacylglycerol lipase-like [ <i>Ostrinia furnacalis</i> ]                          | +3.98(3.11e-11) | +1.98(1.66e-03) |
| ncbi_114349639 | pancreatic triacylglycerol lipase-like [ <i>Ostrinia furnacalis</i> ]                          | -1.43(1.29e-05) | -0.97(2.66e-01) |
| ncbi_114351935 | trypsin, alkaline C-like [ <i>Ostrinia furnacalis</i> ]                                        | +2.08(2.03e-20) | +0.36(1.60e-01) |
| ncbi_114351936 | trypsin, alkaline C-like isoform X1 [ <i>Ostrinia furnacalis</i> ]                             | +2.95(1.20e-08) | +1.29(1.33e-05) |
| ncbi_114351939 | trypsin, alkaline C-like [ <i>Ostrinia furnacalis</i> ]                                        | +1.79(3.27e-03) | +1.33(3.15e-06) |
| ncbi_114351942 | trypsin, alkaline B-like [ <i>Ostrinia furnacalis</i> ]                                        | +3.34(5.79e-10) | +1.22(5.59e-02) |
| ncbi_114352259 | trypsin, alkaline B-like [ <i>Ostrinia furnacalis</i> ]                                        | -1.33(5.98e-07) | -0.42(1.92e-01) |
| ncbi_114352777 | protein lethal(2)essential for life-like [ <i>Ostrinia furnacalis</i> ]                        | -0.15(9.98e-01) | -2.55(4.34e-03) |
| ncbi_114353127 | proton-coupled amino acid transporter-like protein pathetic isoform X1 [ <i>Ostrinia</i> ]     | -1.09(9.67e-06) | -0.02(9.06e-01) |

|                |                                                                                                |                  |                  |
|----------------|------------------------------------------------------------------------------------------------|------------------|------------------|
|                | <i>furnacalis</i> ]                                                                            |                  |                  |
| ncbi_114353674 | pancreatic lipase-related protein 2-like [ <i>Ostrinia furnacalis</i> ]                        | -3.04(2.09e-03)  | -2.87(2.80e-01)  |
| ncbi_114353764 | protein lethal(2)essential for life-like [ <i>Ostrinia furnacalis</i> ]                        | -0.08(9.65e-01)  | -1.50(6.22e-10)  |
| ncbi_114354259 | heat shock protein 68-like [ <i>Ostrinia furnacalis</i> ]                                      | -0.60(7.36e-01)  | -2.32(5.31e-13)  |
| ncbi_114354720 | next to BRCA1 gene 1 protein-like isoform X1 [ <i>Ostrinia furnacalis</i> ]                    | +0.30(5.42e-01)  | -1.53(9.98e-08)  |
| ncbi_114354721 | protein lethal(2)essential for life-like [ <i>Ostrinia furnacalis</i> ]                        | +0.13(6.98e-01)  | -1.57(1.77e-08)  |
| ncbi_114354725 | heat shock protein 68-like [ <i>Ostrinia furnacalis</i> ]                                      | -0.42(8.97e-01)  | -3.26(3.26e-06)  |
| ncbi_114354906 | chymotrypsin-1-like [ <i>Ostrinia furnacalis</i> ]                                             | +1.08(4.58e-22)  | -0.00(7.75e-01)  |
| ncbi_114355297 | proton-coupled amino acid transporter-like protein pathetic [ <i>Ostrinia furnacalis</i> ]     | -1.30(3.53e-08)  | -0.49(1.32e-01)  |
| ncbi_114356221 | heat shock protein 68-like [ <i>Ostrinia furnacalis</i> ]                                      | -0.34(9.18e-01)  | -1.56(1.57e-12)  |
| ncbi_114356222 | protein lethal(2)essential for life-like [ <i>Ostrinia furnacalis</i> ]                        | -0.55(8.27e-01)  | -2.68(5.34e-04)  |
| ncbi_114357580 | trans-1,2-dihydrobenzene-1,2-diol dehydrogenase-like isoform X3 [ <i>Ostrinia furnacalis</i> ] | +2.33(1.80e-02)  | +2.65(4.86e-03)  |
| ncbi_114357646 | trypsin, alkaline C-like [ <i>Ostrinia furnacalis</i> ]                                        | +3.04(2.61e-03)  | +1.07(2.37e-01)  |
| ncbi_114357736 | UDP-glucuronosyltransferase 2B14-like [ <i>Ostrinia furnacalis</i> ]                           | +3.38(2.16e-03)  | +1.67(2.97e-01)  |
| ncbi_114357739 | UDP-glucuronosyltransferase 2B14-like isoform X1 [ <i>Ostrinia furnacalis</i> ]                | +2.45(6.40e-03)  | +1.62(2.10e-01)  |
| ncbi_114357991 | pancreatic triacylglycerol lipase-like isoform X1 [ <i>Ostrinia furnacalis</i> ]               | -1.47(7.36e-04)  | -0.07(9.98e-01)  |
| ncbi_114358382 | protein lethal(2)essential for life-like [ <i>Ostrinia furnacalis</i> ]                        | -0.39(9.10e-01)  | -2.36(1.81e-13)  |
| ncbi_114358386 | protein lethal(2)essential for life-like [ <i>Ostrinia furnacalis</i> ]                        | -0.05(9.21e-01)  | -1.48(2.36e-07)  |
| ncbi_114358387 | protein lethal(2)essential for life-like [ <i>Ostrinia furnacalis</i> ]                        | -0.19(9.54e-01)  | -1.82(1.26e-16)  |
| ncbi_114359074 | carboxypeptidase B-like [ <i>Ostrinia furnacalis</i> ]                                         | +2.38(2.08e-18)  | +1.00(1.39e-05)  |
| ncbi_114359077 | carboxypeptidase B-like [ <i>Ostrinia furnacalis</i> ]                                         | +1.88(5.10e-12)  | +1.07(5.23e-04)  |
| ncbi_114359798 | chymotrypsin-like elastase family member 2A [ <i>Ostrinia furnacalis</i> ]                     | +1.04(2.94e-04)  | +0.12(7.03e-01)  |
| ncbi_114359801 | collagenase-like [ <i>Ostrinia furnacalis</i> ]                                                | +1.81(6.67e-41)  | +0.94(5.02e-10)  |
| ncbi_114360123 | short-chain dehydrogenase/reductase family 16C member 6 [ <i>Ostrinia furnacalis</i> ]         | -4.96(1.90e-05)  | -4.23(2.58e-05)  |
| ncbi_114360499 | trypsin, alkaline A-like [ <i>Ostrinia furnacalis</i> ]                                        | +10.93(8.66e-03) | +10.67(5.24e-03) |

|                |                                                                                          |                 |                 |
|----------------|------------------------------------------------------------------------------------------|-----------------|-----------------|
| ncbi_114360773 | glutathione S-transferase 1-like [ <i>Ostrinia furnacalis</i> ]                          | +1.91(3.46e-02) | +2.75(8.12e-11) |
| ncbi_114361580 | heat shock protein Hsp-12.2-like [ <i>Ostrinia furnacalis</i> ]                          | -0.73(7.31e-01) | -2.85(2.01e-26) |
| ncbi_114362420 | acetylcholinesterase-like [ <i>Ostrinia furnacalis</i> ]                                 | +1.55(6.75e-03) | +0.75(8.24e-02) |
| ncbi_114362872 | alpha-amylase 2-like isoform X3 [ <i>Ostrinia furnacalis</i> ]                           | -1.91(2.25e-11) | -0.66(9.86e-02) |
| ncbi_114363240 | trypsin theta-like isoform X1 [ <i>Ostrinia furnacalis</i> ]                             | +1.15(1.65e-08) | +0.20(3.11e-01) |
| ncbi_114363773 | heat shock protein 68-like [ <i>Ostrinia furnacalis</i> ]                                | -0.06(9.75e-01) | -2.90(1.61e-02) |
| ncbi_114364477 | proton-coupled amino acid transporter-like protein CG1139 [ <i>Ostrinia furnacalis</i> ] | -1.25(2.91e-03) | +0.25(4.74e-01) |
| ncbi_114365341 | glutathione S-transferase-like [ <i>Ostrinia furnacalis</i> ]                            | -1.66(3.11e-11) | -1.33(7.81e-05) |
| ncbi_114366668 | UDP-glucuronosyltransferase 2B1-like isoform X3 [ <i>Ostrinia furnacalis</i> ]           | -1.35(6.12e-03) | -0.84(6.99e-02) |
| ncbi_114366687 | BCL2/adenovirus E1B 19 kDa protein-interacting protein 3 [ <i>Ostrinia furnacalis</i> ]  | +0.21(6.24e-01) | -1.10(1.12e-02) |
| ncbi_114366714 | GTP-binding protein SAR1b [ <i>Ostrinia furnacalis</i> ]                                 | -0.16(9.79e-01) | +1.02(3.23e-04) |



**Table S3 Gene ontology analysis of *Ostrinia furnacalis* transcriptome**

| <b>GO ID (Ontology)</b>  | <b>GO Term (level1)</b> | <b>GO ID (GO-terms)</b> | <b>GO Term (level2)</b>                            | <b>Number of genes</b> | <b>up</b> | <b>down</b> |
|--------------------------|-------------------------|-------------------------|----------------------------------------------------|------------------------|-----------|-------------|
| <b>ACB-BtS vs.ACB-FR</b> |                         |                         |                                                    |                        |           |             |
| GO:0003674               | Molecular Function      | GO:0003824              | catalytic activity                                 | 100                    | 42        | 58          |
| GO:0003674               | Molecular Function      | GO:0005488              | binding                                            | 72                     | 22        | 50          |
| GO:0003674               | Molecular Function      | GO:0005215              | transporter activity                               | 7                      | 1         | 6           |
| GO:0003674               | Molecular Function      | GO:0005198              | structural molecule activity                       | 4                      | 3         | 1           |
| GO:0003674               | Molecular Function      | GO:0098772              | molecular function regulator                       | 4                      | 1         | 3           |
| GO:0003674               | Molecular Function      | GO:0060089              | molecular transducer activity                      | 4                      | 1         | 3           |
| GO:0003674               | Molecular Function      | GO:0004871              | signal transducer activity                         | 3                      | 1         | 2           |
| GO:0003674               | Molecular Function      | GO:0000988              | transcription factor activity, protein binding     | 2                      | 1         | 1           |
| GO:0003674               | Molecular Function      | GO:0016209              | antioxidant activity                               | 1                      | 0         | 1           |
| GO:0003674               | Molecular Function      | GO:0001071              | nucleic acid binding transcription factor activity | 1                      | 0         | 1           |
| GO:0008150               | Biological Process      | GO:0044699              | single-organism process                            | 91                     | 27        | 64          |
| GO:0008150               | Biological Process      | GO:0009987              | cellular process                                   | 90                     | 22        | 68          |
| GO:0008150               | Biological Process      | GO:0008152              | metabolic process                                  | 88                     | 27        | 61          |
| GO:0008150               | Biological Process      | GO:0065007              | biological regulation                              | 55                     | 13        | 42          |
| GO:0008150               | Biological Process      | GO:0050789              | regulation of biological process                   | 52                     | 13        | 39          |
| GO:0008150               | Biological Process      | GO:0050896              | response to stimulus                               | 45                     | 9         | 36          |
| GO:0008150               | Biological Process      | GO:0032501              | multicellular organismal process                   | 45                     | 12        | 33          |
| GO:0008150               | Biological Process      | GO:0032502              | developmental process                              | 43                     | 13        | 30          |
| GO:0008150               | Biological Process      | GO:0051179              | localization                                       | 30                     | 11        | 19          |
| GO:0008150               | Biological Process      | GO:0023052              | signaling                                          | 20                     | 5         | 15          |

|            |                    |            |                                                       |    |    |    |
|------------|--------------------|------------|-------------------------------------------------------|----|----|----|
| GO:0008150 | Biological Process | GO:0071840 | cellular component organization or biogenesis         | 20 | 5  | 15 |
| GO:0008150 | Biological Process | GO:0007610 | behavior                                              | 12 | 4  | 8  |
| GO:0008150 | Biological Process | GO:0048519 | negative regulation of biological process             | 11 | 4  | 7  |
| GO:0008150 | Biological Process | GO:0051704 | multi-organism process                                | 11 | 3  | 8  |
| GO:0008150 | Biological Process | GO:0002376 | immune system process                                 | 10 | 2  | 8  |
| GO:0008150 | Biological Process | GO:0022414 | reproductive process                                  | 9  | 2  | 7  |
| GO:0008150 | Biological Process | GO:0000003 | reproduction                                          | 9  | 2  | 7  |
| GO:0008150 | Biological Process | GO:0048518 | positive regulation of biological process             | 8  | 3  | 5  |
| GO:0008150 | Biological Process | GO:0040007 | growth                                                | 6  | 2  | 4  |
| GO:0008150 | Biological Process | GO:0040011 | locomotion                                            | 6  | 2  | 4  |
| GO:0008150 | Biological Process | GO:0099531 | presynaptic process involved in synaptic transmission | 1  | 0  | 1  |
| GO:0008150 | Biological Process | GO:0022610 | biological adhesion                                   | 1  | 0  | 1  |
| GO:0005575 | Cellular Component | GO:0044464 | cell part                                             | 68 | 19 | 49 |
| GO:0005575 | Cellular Component | GO:0005623 | cell                                                  | 68 | 19 | 49 |
| GO:0005575 | Cellular Component | GO:0043226 | organelle                                             | 56 | 16 | 40 |
| GO:0005575 | Cellular Component | GO:0016020 | membrane                                              | 34 | 11 | 23 |
| GO:0005575 | Cellular Component | GO:0044422 | organelle part                                        | 23 | 8  | 15 |
| GO:0005575 | Cellular Component | GO:0032991 | macromolecular complex                                | 19 | 4  | 15 |
| GO:0005575 | Cellular Component | GO:0044425 | membrane part                                         | 14 | 5  | 9  |
| GO:0005575 | Cellular Component | GO:0031974 | membrane-enclosed lumen                               | 8  | 4  | 4  |
| GO:0005575 | Cellular Component | GO:0045202 | synapse                                               | 5  | 2  | 3  |
| GO:0005575 | Cellular Component | GO:0005576 | extracellular region                                  | 5  | 2  | 3  |
| GO:0005575 | Cellular Component | GO:0044456 | synapse part                                          | 4  | 2  | 2  |
| GO:0005575 | Cellular Component | GO:0044421 | extracellular region part                             | 4  | 2  | 2  |

|                            |                    |            |                                                    |    |    |    |
|----------------------------|--------------------|------------|----------------------------------------------------|----|----|----|
| GO:0005575                 | Cellular Component | GO:0030054 | cell junction                                      | 2  | 0  | 2  |
| <b>ACB-BtS vs. ACB-IeR</b> |                    |            |                                                    |    |    |    |
| GO:0003674                 | Molecular Function | GO:0003824 | catalytic activity                                 | 78 | 39 | 39 |
| GO:0003674                 | Molecular Function | GO:0005488 | binding                                            | 57 | 22 | 35 |
| GO:0003674                 | Molecular Function | GO:0005215 | transporter activity                               | 4  | 3  | 1  |
| GO:0003674                 | Molecular Function | GO:0004871 | signal transducer activity                         | 3  | 1  | 2  |
| GO:0003674                 | Molecular Function | GO:0060089 | molecular transducer activity                      | 3  | 1  | 2  |
| GO:0003674                 | Molecular Function | GO:0016209 | antioxidant activity                               | 1  | 0  | 1  |
| GO:0003674                 | Molecular Function | GO:0005198 | structural molecule activity                       | 1  | 1  | 0  |
| GO:0003674                 | Molecular Function | GO:0098772 | molecular function regulator                       | 1  | 0  | 1  |
| GO:0003674                 | Molecular Function | GO:0001071 | nucleic acid binding transcription factor activity | 1  | 1  | 0  |
| GO:0008150                 | Biological Process | GO:0044699 | single-organism process                            | 67 | 24 | 43 |
| GO:0008150                 | Biological Process | GO:0009987 | cellular process                                   | 58 | 23 | 35 |
| GO:0008150                 | Biological Process | GO:0008152 | metabolic process                                  | 52 | 21 | 31 |
| GO:0008150                 | Biological Process | GO:0065007 | biological regulation                              | 36 | 13 | 23 |
| GO:0008150                 | Biological Process | GO:0050896 | response to stimulus                               | 35 | 11 | 24 |
| GO:0008150                 | Biological Process | GO:0050789 | regulation of biological process                   | 34 | 11 | 23 |
| GO:0008150                 | Biological Process | GO:0032501 | multicellular organismal process                   | 33 | 14 | 19 |
| GO:0008150                 | Biological Process | GO:0032502 | developmental process                              | 28 | 12 | 16 |
| GO:0008150                 | Biological Process | GO:0051179 | localization                                       | 21 | 12 | 9  |
| GO:0008150                 | Biological Process | GO:0023052 | signaling                                          | 17 | 6  | 11 |
| GO:0008150                 | Biological Process | GO:0071840 | cellular component organization or biogenesis      | 14 | 6  | 8  |
| GO:0008150                 | Biological Process | GO:0051704 | multi-organism process                             | 11 | 3  | 8  |
| GO:0008150                 | Biological Process | GO:0002376 | immune system process                              | 8  | 5  | 3  |
| GO:0008150                 | Biological Process | GO:0022414 | reproductive process                               | 8  | 3  | 5  |

|            |                    |            |                                           |    |    |    |
|------------|--------------------|------------|-------------------------------------------|----|----|----|
| GO:0008150 | Biological Process | GO:0000003 | reproduction                              | 8  | 3  | 5  |
| GO:0008150 | Biological Process | GO:0048518 | positive regulation of biological process | 8  | 5  | 3  |
| GO:0008150 | Biological Process | GO:0007610 | behavior                                  | 6  | 4  | 2  |
| GO:0008150 | Biological Process | GO:0040011 | locomotion                                | 6  | 2  | 4  |
| GO:0008150 | Biological Process | GO:0048519 | negative regulation of biological process | 4  | 0  | 4  |
| GO:0008150 | Biological Process | GO:0040007 | growth                                    | 3  | 1  | 2  |
| GO:0008150 | Biological Process | GO:0022610 | biological adhesion                       | 2  | 1  | 1  |
| GO:0008150 | Biological Process | GO:0044848 | biological phase                          | 1  | 1  | 0  |
| GO:0005575 | Cellular Component | GO:0044464 | cell part                                 | 55 | 20 | 35 |
| GO:0005575 | Cellular Component | GO:0005623 | cell                                      | 55 | 20 | 35 |
| GO:0005575 | Cellular Component | GO:0043226 | organelle                                 | 44 | 17 | 27 |
| GO:0005575 | Cellular Component | GO:0016020 | membrane                                  | 28 | 12 | 16 |
| GO:0005575 | Cellular Component | GO:0044422 | organelle part                            | 20 | 9  | 11 |
| GO:0005575 | Cellular Component | GO:0032991 | macromolecular complex                    | 14 | 8  | 6  |
| GO:0005575 | Cellular Component | GO:0044425 | membrane part                             | 12 | 6  | 6  |
| GO:0005575 | Cellular Component | GO:0031974 | membrane-enclosed lumen                   | 9  | 2  | 7  |
| GO:0005575 | Cellular Component | GO:0005576 | extracellular region                      | 6  | 4  | 2  |
| GO:0005575 | Cellular Component | GO:0044421 | extracellular region part                 | 4  | 3  | 1  |
| GO:0005575 | Cellular Component | GO:0044456 | synapse part                              | 3  | 3  | 0  |
| GO:0005575 | Cellular Component | GO:0045202 | synapse                                   | 3  | 3  | 0  |
| GO:0005575 | Cellular Component | GO:0030054 | cell junction                             | 3  | 1  | 2  |
| GO:0005575 | Cellular Component | GO:0031012 | extracellular matrix                      | 1  | 1  | 0  |

**Table S4 Significantly enriched KEGG pathways in *Ostrinia furnacalis***

| Pathway ID                 | Pathway                                         | Pvalue   | Differentially expressed genes with pathway annotation | All genes with pathway annotation |
|----------------------------|-------------------------------------------------|----------|--------------------------------------------------------|-----------------------------------|
| <b>ACB-BtS vs.ACB-FR</b>   |                                                 |          | <b>Totally 130</b>                                     | <b>Totally 4856</b>               |
| ko04213                    | Longevity regulating pathway - multiple species | 0.000000 | 13 (10%)                                               | 85 (1.75%)                        |
| ko04141                    | Protein processing in endoplasmic reticulum     | 0.000036 | 14 (10.77%)                                            | 149 (3.07%)                       |
| ko04612                    | Antigen processing and presentation             | 0.000232 | 5 (3.85%)                                              | 22 (0.45%)                        |
| ko05134                    | Legionellosis                                   | 0.000518 | 6 (4.62%)                                              | 39 (0.8%)                         |
| ko00830                    | Retinol metabolism                              | 0.005906 | 6 (4.62%)                                              | 62 (1.28%)                        |
| ko02010                    | ABC transporters                                | 0.005906 | 6 (4.62%)                                              | 62 (1.28%)                        |
| ko01523                    | Antifolate resistance                           | 0.008812 | 4 (3.08%)                                              | 31 (0.64%)                        |
| ko00980                    | Metabolism of xenobiotics by cytochrome P450    | 0.011320 | 6 (4.62%)                                              | 71 (1.46%)                        |
| ko04974                    | Protein digestion and absorption                | 0.011457 | 10 (7.69%)                                             | 163 (3.36%)                       |
| ko00982                    | Drug metabolism - cytochrome P450               | 0.021452 | 5 (3.85%)                                              | 60 (1.24%)                        |
| ko04972                    | Pancreatic secretion                            | 0.037338 | 10 (7.69%)                                             | 197 (4.06%)                       |
| ko05204                    | Chemical carcinogenesis                         | 0.038542 | 5 (3.85%)                                              | 70 (1.44%)                        |
| ko04975                    | Fat digestion and absorption                    | 0.040604 | 5 (3.85%)                                              | 71 (1.46%)                        |
| ko04071                    | Sphingolipid signaling pathway                  | 0.042732 | 5 (3.85%)                                              | 72 (1.48%)                        |
| ko04915                    | Estrogen signaling pathway                      | 0.044927 | 5 (3.85%)                                              | 73 (1.5%)                         |
| <b>ACB-BtS vs. ACB-IeR</b> |                                                 |          | <b>Totally 94</b>                                      | <b>Totally 4856</b>               |
| ko04972                    | Pancreatic secretion                            | 0.000000 | 19 (20.21%)                                            | 197 (4.06%)                       |
| ko04974                    | Protein digestion and absorption                | 0.000000 | 16 (17.02%)                                            | 163 (3.36%)                       |
| ko00980                    | Metabolism of xenobiotics by cytochrome P450    | 0.000394 | 7 (7.45%)                                              | 71 (1.46%)                        |
| ko00982                    | Drug metabolism - cytochrome P450               | 0.000967 | 6 (6.38%)                                              | 60 (1.24%)                        |

|         |                                          |          |            |               |
|---------|------------------------------------------|----------|------------|---------------|
| ko00830 | Retinol metabolism                       | 0.001151 | 6 (6.38%)  | 62 (1.28%)    |
| ko05164 | Influenza A                              | 0.001210 | 9 (9.57%)  | 137 (2.82%)   |
| ko05204 | Chemical carcinogenesis                  | 0.002168 | 6 (6.38%)  | 70 (1.44%)    |
| ko04080 | Neuroactive ligand-receptor interaction  | 0.002177 | 9 (9.57%)  | 149 (3.07%)   |
| ko00040 | Pentose and glucuronate interconversions | 0.005361 | 5 (5.32%)  | 59 (1.21%)    |
| ko02010 | ABC transporters                         | 0.006622 | 5 (5.32%)  | 62 (1.28%)    |
| ko00561 | Glycerolipid metabolism                  | 0.006787 | 6 (6.38%)  | 88 (1.81%)    |
| ko00140 | Steroid hormone biosynthesis             | 0.007063 | 4 (4.26%)  | 40 (0.82%)    |
| ko04975 | Fat digestion and absorption             | 0.011631 | 5 (5.32%)  | 71 (1.46%)    |
| ko00983 | Drug metabolism - other enzymes          | 0.014218 | 6 (6.38%)  | 103 (2.12%)   |
| ko00053 | Ascorbate and aldarate metabolism        | 0.015376 | 4 (4.26%)  | 50 (1.03%)    |
| ko00860 | Porphyrin and chlorophyll metabolism     | 0.017555 | 4 (4.26%)  | 52 (1.07%)    |
| ko01100 | Metabolic pathways                       | 0.031157 | 36 (38.3%) | 1407 (28.97%) |
| ko04976 | Bile secretion                           | 0.049927 | 4 (4.26%)  | 72 (1.48%)    |

**Table S5 Differentially expressed genes among ACB-BtS, ACB-FR and ACB-IeR**

| Gene ID                  | Description                                                                                       | log2(fc) | PValue   | FDR      |
|--------------------------|---------------------------------------------------------------------------------------------------|----------|----------|----------|
| <b>ACB-BtS vs.ACB-FR</b> |                                                                                                   |          |          |          |
| MSTRG.10516              | Retrovirus-related Pol polyprotein from transposon TNT 1-94 [Trichinella sp. T9]                  | -1.73    | 5.84e-04 | 8.45e-03 |
| MSTRG.11204              | -                                                                                                 | -1.29    | 6.23e-04 | 8.84e-03 |
| MSTRG.11721              | polyprotein [Operophtera brumata]                                                                 | +2.54    | 1.48e-08 | 1.76e-06 |
| MSTRG.12449              | uncharacterized protein LOC114363438 [Ostrinia furnacalis]                                        | -1.05    | 5.04e-05 | 1.30e-03 |
| MSTRG.12462              | uncharacterized protein LOC114363310 [Ostrinia furnacalis]                                        | -1.56    | 1.09e-04 | 2.38e-03 |
| MSTRG.1319               | PREDICTED: RNA-directed DNA polymerase from mobile element jockey-like [Papilio machaon]          | -2.48    | 2.57e-05 | 7.66e-04 |
| MSTRG.13843              | gag-pol polyprotein [Lasius niger]                                                                | +2.96    | 7.65e-06 | 2.95e-04 |
| MSTRG.14142              | UDP-glucuronosyltransferase 2B15-like [Ostrinia furnacalis]                                       | +2.31    | 1.05e-15 | 8.21e-13 |
| MSTRG.14366              | PREDICTED: nuclear transcription factor Y subunit gamma-like [Amyeloidis transitella]             | +2.46    | 5.14e-12 | 1.59e-09 |
| MSTRG.14429              | PREDICTED: RNA-directed DNA polymerase from mobile element jockey-like, partial [Papilio machaon] | -1.28    | 1.37e-04 | 2.84e-03 |
| MSTRG.14691              | -                                                                                                 | +3.28    | 1.53e-18 | 2.00e-15 |
| MSTRG.14718              | Retrovirus-related Pol polyprotein from transposon TNT 1-94 [Eumeta japonica]                     | -1.08    | 1.81e-03 | 1.99e-02 |
| MSTRG.14779              | -                                                                                                 | +2.95    | 4.84e-03 | 4.02e-02 |
| MSTRG.14792              | carboxylesterase, partial [Ostrinia furnacalis]                                                   | -1.24    | 7.27e-11 | 1.62e-08 |
| MSTRG.14891              | protein cps3-like [Manduca sexta]                                                                 | +1.01    | 4.78e-03 | 3.99e-02 |
| MSTRG.15032              | polyprotein [Antheraea mylitta]                                                                   | +2.44    | 2.13e-05 | 6.58e-04 |
| MSTRG.15192              | -                                                                                                 | -1.20    | 7.59e-07 | 4.39e-05 |
| MSTRG.15302              | Histone-lysine N-methyltransferase SETMAR [Eumeta japonica]                                       | +3.29    | 2.19e-03 | 2.28e-02 |
| MSTRG.16274              | -                                                                                                 | -1.00    | 1.94e-03 | 2.09e-02 |
| MSTRG.17777              | arylphorin subunit alpha-like [Ostrinia furnacalis]                                               | -5.71    | 1.91e-03 | 2.06e-02 |
| MSTRG.18395              | -                                                                                                 | +2.77    | 6.64e-09 | 8.69e-07 |

|             |                                                                                                     |       |          |          |
|-------------|-----------------------------------------------------------------------------------------------------|-------|----------|----------|
| MSTRG.18486 | -                                                                                                   | -2.63 | 2.25e-03 | 2.32e-02 |
| MSTRG.1876  | -                                                                                                   | +1.59 | 6.43e-05 | 1.60e-03 |
| MSTRG.18991 | seminal fluid protein HACP044 [Danaus plexippus plexippus]                                          | -1.98 | 1.00e-03 | 1.28e-02 |
| MSTRG.19083 | THAP domain-containing protein 2-like [Ostrinia furnacalis]                                         | -1.67 | 4.47e-05 | 1.18e-03 |
| MSTRG.19665 | Transposable element Tc3 transposase [Eumeta japonica]                                              | -1.17 | 8.12e-04 | 1.08e-02 |
| MSTRG.19724 | reverse transcriptase [Ostrinia nubilalis]                                                          | -3.34 | 1.07e-11 | 2.84e-09 |
| MSTRG.1988  | Histone-lysine N-methyltransferase SETMAR [Eumeta japonica]                                         | +3.65 | 8.53e-04 | 1.12e-02 |
| MSTRG.20008 | PREDICTED: retrovirus-related Pol polyprotein from transposon 17.6 isoform X1 [Tribolium castaneum] | +1.49 | 2.29e-03 | 2.35e-02 |
| MSTRG.20601 | -                                                                                                   | -1.20 | 3.18e-03 | 3.02e-02 |
| MSTRG.20602 | MULE domain-containing protein [Aphis craccivora]                                                   | -9.22 | 1.76e-04 | 3.46e-03 |
| MSTRG.21164 | ectopic P granules protein 5 homolog [Hyposmocoma kahamanoa]                                        | -1.12 | 1.68e-03 | 1.88e-02 |
| MSTRG.2161  | -                                                                                                   | -1.26 | 1.91e-09 | 2.88e-07 |
| MSTRG.21877 | -                                                                                                   | -1.48 | 8.89e-05 | 2.04e-03 |
| MSTRG.21950 | rna-directed dna polymerase from mobile element jockey-like protein [Lasius niger]                  | +3.51 | 3.19e-03 | 3.02e-02 |
| MSTRG.21972 | -                                                                                                   | -1.15 | 1.86e-07 | 1.47e-05 |
| MSTRG.22677 | Retrovirus-related Pol polyprotein from transposon 297 [Araneus ventricosus]                        | -1.87 | 2.57e-03 | 2.57e-02 |
| MSTRG.23031 | hypothetical protein evm_011585 [Chilo suppressalis]                                                | -2.48 | 5.83e-03 | 4.62e-02 |
| MSTRG.23064 | -                                                                                                   | -1.11 | 4.75e-04 | 7.24e-03 |
| MSTRG.23493 | hypothetical protein evm_000661 [Chilo suppressalis]                                                | -2.26 | 2.25e-03 | 2.32e-02 |
| MSTRG.23630 | transmembrane protein adipocyte-associated 1 homolog isoform X2 [Hyposmocoma kahamanoa]             | -1.60 | 5.37e-07 | 3.46e-05 |
| MSTRG.24953 | PREDICTED: vesicle transport protein GOT1B-like [Plutella xylostella]                               | -1.07 | 4.17e-03 | 3.65e-02 |
| MSTRG.2537  | Retrovirus-related Pol polyprotein from transposon TNT 1-94 [Eumeta japonica]                       | -1.74 | 5.55e-04 | 8.15e-03 |
| MSTRG.25409 | gamma-tubulin complex component 2-like isoform X2 [Ostrinia furnacalis]                             | -1.49 | 6.53e-04 | 9.15e-03 |
| MSTRG.25437 | uncharacterized protein LOC114351417 [Ostrinia furnacalis]                                          | +2.02 | 9.49e-06 | 3.48e-04 |



|             |                                                                                                          |       |          |          |
|-------------|----------------------------------------------------------------------------------------------------------|-------|----------|----------|
| MSTRG.25513 | -                                                                                                        | -1.04 | 4.39e-06 | 1.88e-04 |
| MSTRG.25630 | uncharacterized protein LOC114350796 [Ostrinia furnacalis]                                               | +2.80 | 6.61e-05 | 1.64e-03 |
| MSTRG.25758 | -                                                                                                        | -1.68 | 3.88e-05 | 1.05e-03 |
| MSTRG.25972 | gag-pol polyprotein [Lasius niger]                                                                       | +2.54 | 7.00e-07 | 4.21e-05 |
| MSTRG.25973 | pol polyprotein-like protein [Leptotrombidium deliense]                                                  | +2.82 | 6.76e-05 | 1.66e-03 |
| MSTRG.26169 | uncharacterized protein LOC114362841 isoform X2 [Ostrinia furnacalis]                                    | +3.33 | 1.43e-03 | 1.67e-02 |
| MSTRG.26200 | Retrovirus-related Pol polyprotein from type-1 retrotransposable element R1 [Eumeta japonica]            | -1.22 | 3.50e-10 | 6.44e-08 |
| MSTRG.26234 | extensin-like [Bombyx mandarina]                                                                         | -1.23 | 1.46e-05 | 4.87e-04 |
| MSTRG.26321 | retroelement polyprotein [Glyptapanteles flavicoxis]                                                     | +4.17 | 1.72e-03 | 1.91e-02 |
| MSTRG.26453 | nephrin-like [Ostrinia furnacalis]                                                                       | -4.29 | 5.88e-04 | 8.51e-03 |
| MSTRG.2646  | hypothetical protein evm_006816 [Chilo suppressalis]                                                     | -1.26 | 6.91e-05 | 1.69e-03 |
| MSTRG.26467 | equilibrative nucleoside transporter 1 isoform X3 [Ostrinia furnacalis]                                  | +1.31 | 3.79e-04 | 6.10e-03 |
| MSTRG.2777  | Transposon Tf2-6 polyprotein [Eumeta japonica]                                                           | -3.21 | 9.37e-05 | 2.13e-03 |
| MSTRG.2994  | reverse transcriptase [Anguilla japonica]                                                                | +2.04 | 7.29e-07 | 4.30e-05 |
| MSTRG.3070  | PREDICTED: RNA-directed DNA polymerase from mobile element jockey-like isoform X1 [Amyelois transitella] | -1.95 | 4.28e-03 | 3.71e-02 |
| MSTRG.3632  | PREDICTED: neutral ceramidase [Papilio xuthus]                                                           | -2.51 | 3.60e-05 | 9.93e-04 |
| MSTRG.4415  | -                                                                                                        | -5.47 | 7.72e-06 | 2.97e-04 |
| MSTRG.4860  | src substrate cortactin [Spodoptera litura]                                                              | -1.58 | 6.67e-06 | 2.61e-04 |
| MSTRG.5318  | Transposon Tf2-6 polyprotein [Eumeta japonica]                                                           | -2.21 | 1.52e-13 | 8.12e-11 |
| MSTRG.625   | DNA transposase THAP9 [Araneus ventricosus]                                                              | -1.07 | 2.95e-03 | 2.86e-02 |
| MSTRG.6300  | microtubule-associated serine/threonine-protein kinase 4 [Ostrinia furnacalis]                           | -4.57 | 1.83e-06 | 9.02e-05 |
| MSTRG.6385  | -                                                                                                        | +1.58 | 3.20e-06 | 1.46e-04 |
| MSTRG.6636  | hypothetical protein evm_003645 [Chilo suppressalis]                                                     | +1.59 | 1.49e-04 | 3.05e-03 |
| MSTRG.7260  | gag-pol polyprotein [Lasius niger]                                                                       | +1.11 | 8.50e-05 | 1.97e-03 |

|                |                                                                                         |        |          |          |
|----------------|-----------------------------------------------------------------------------------------|--------|----------|----------|
| MSTRG.8248     | -                                                                                       | +2.85  | 1.27e-03 | 1.52e-02 |
| MSTRG.9028     | -                                                                                       | -1.44  | 4.88e-03 | 4.05e-02 |
| MSTRG.9141     | THAP domain-containing protein 2-like [Ostrinia furnacalis]                             | -1.59  | 3.96e-03 | 3.51e-02 |
| MSTRG.9260     | -                                                                                       | +11.37 | 3.15e-05 | 8.82e-04 |
| MSTRG.9261     | -                                                                                       | -1.58  | 1.31e-03 | 1.56e-02 |
| MSTRG.9381     | -                                                                                       | -1.79  | 1.83e-04 | 3.57e-03 |
| MSTRG.9428     | Intraflagellar transport protein 81 [Folsomia candida]                                  | +5.39  | 9.59e-05 | 2.15e-03 |
| ncbi_114349548 | glycerol-3-phosphate dehydrogenase, mitochondrial-like isoform X4 [Ostrinia furnacalis] | +1.73  | 3.12e-22 | 7.35e-19 |
| ncbi_114349570 | centromere protein I-like [Ostrinia furnacalis]                                         | -1.15  | 7.32e-04 | 1.00e-02 |
| ncbi_114349603 | pancreatic lipase-related protein 2-like [Ostrinia furnacalis]                          | +1.78  | 1.21e-03 | 1.47e-02 |
| ncbi_114349629 | pancreatic triacylglycerol lipase-like [Ostrinia furnacalis]                            | +1.98  | 6.78e-05 | 1.66e-03 |
| ncbi_114349648 | AAEL013537-PB [Aedes aegypti]                                                           | +2.20  | 6.00e-03 | 4.72e-02 |
| ncbi_114349651 | cyclic nucleotide-gated cation channel beta-3 isoform X1 [Ostrinia furnacalis]          | +2.32  | 3.53e-09 | 5.07e-07 |
| ncbi_114349707 | Kynurenine formamidase [Danaus plexippus plexippus]                                     | -1.28  | 1.92e-03 | 2.07e-02 |
| ncbi_114349711 | Formin-like protein 2 [Papilio machaon]                                                 | -1.06  | 1.15e-03 | 1.42e-02 |
| ncbi_114349888 | ribonucleoside-diphosphate reductase large subunit [Ostrinia furnacalis]                | -1.09  | 8.05e-06 | 3.07e-04 |
| ncbi_114349930 | PREDICTED: ice nucleation protein-like [Amyeloidis transitella]                         | +5.55  | 4.87e-04 | 7.38e-03 |
| ncbi_114349932 | ATP-binding cassette sub-family A member 1-like [Ostrinia furnacalis]                   | +4.03  | 2.27e-06 | 1.08e-04 |
| ncbi_114349935 | diacylglycerol kinase theta [Hyposmocoma kahamanoa]                                     | +6.00  | 1.63e-07 | 1.33e-05 |
| ncbi_114350009 | nuclease HARBI1-like [Acyrtosiphon pisum]                                               | -2.18  | 5.92e-04 | 8.53e-03 |
| ncbi_114350010 | myb/SANT-like DNA-binding domain-containing protein 4, partial [Photinus pyralis]       | -1.03  | 1.05e-04 | 2.32e-03 |
| ncbi_114350169 | asparagine synthetase [glutamine-hydrolyzing] [Ostrinia furnacalis]                     | +1.40  | 5.53e-13 | 2.41e-10 |
| ncbi_114350216 | kynureninase [Bombyx mori]                                                              | -2.07  | 1.08e-04 | 2.37e-03 |
| ncbi_114350246 | tyramine beta-hydroxylase isoform X1 [Ostrinia furnacalis]                              | -3.49  | 1.86e-03 | 2.02e-02 |
| ncbi_114350299 | Retrovirus-related Pol polyprotein from transposon 297 [Eumeta japonica]                | -9.81  | 1.11e-03 | 1.38e-02 |

|                |                                                                                                  |       |          |          |
|----------------|--------------------------------------------------------------------------------------------------|-------|----------|----------|
| ncbi_114350307 | Gag-pol polyprotein [Operophtera brumata]                                                        | +2.11 | 4.62e-04 | 7.10e-03 |
| ncbi_114350454 | larval cuticle protein LCP-17-like [Ostrinia furnacalis]                                         | +1.35 | 1.54e-07 | 1.28e-05 |
| ncbi_114350455 | double-stranded RNA-specific editase 1-like [Ostrinia furnacalis]                                | -1.21 | 1.06e-10 | 2.19e-08 |
| ncbi_114350508 | probable basic-leucine zipper transcription factor G [Bombyx mori]                               | -1.44 | 3.16e-03 | 3.00e-02 |
| ncbi_114350515 | piggyBac transposable element-derived protein 4-like isoform X1 [Ostrinia furnacalis]            | -1.07 | 2.08e-05 | 6.46e-04 |
| ncbi_114350530 | protein unc-93 homolog A [Helicoverpa armigera]                                                  | -1.56 | 8.04e-04 | 1.07e-02 |
| ncbi_114350533 | Probable RNA-directed DNA polymerase from transposon BS [Eumeta japonica]                        | +2.55 | 3.09e-07 | 2.15e-05 |
| ncbi_114350537 | Endonuclease-reverse transcriptase [Operophtera brumata]                                         | -1.86 | 3.30e-19 | 4.86e-16 |
| ncbi_114350556 | PREDICTED: LOW QUALITY PROTEIN: transmembrane protein 53-like [Plutella xylostella]              | +1.29 | 1.08e-11 | 2.84e-09 |
| ncbi_114350635 | tetraspanin-33-like [Ostrinia furnacalis]                                                        | -1.29 | 3.15e-04 | 5.30e-03 |
| ncbi_114350651 | uncharacterized protein LOC114350651 [Ostrinia furnacalis]                                       | -1.68 | 5.74e-09 | 7.68e-07 |
| ncbi_114350698 | cytochrome P450 CYP12A2-like [Ostrinia furnacalis]                                               | -1.19 | 3.75e-07 | 2.49e-05 |
| ncbi_114350734 | Ribonuclease H-like domain,Integrase, catalytic core,Reverse transcriptase domain [Cinara cedri] | -2.31 | 3.22e-03 | 3.03e-02 |
| ncbi_114350784 | THAP domain-containing protein 2 [Eumeta japonica]                                               | -1.68 | 2.66e-04 | 4.75e-03 |
| ncbi_114350885 | cubilin homolog [Ostrinia furnacalis]                                                            | +3.36 | 9.39e-05 | 2.13e-03 |
| ncbi_114351007 | transcription factor Adf-1-like [Trichoplusia ni]                                                | -1.30 | 5.01e-03 | 4.14e-02 |
| ncbi_114351014 | testis-specific serine/threonine-protein kinase 3-like [Ostrinia furnacalis]                     | +9.00 | 1.47e-03 | 1.70e-02 |
| ncbi_114351044 | gag-pol polyprotein precursor [Lasius niger]                                                     | -1.44 | 1.01e-03 | 1.29e-02 |
| ncbi_114351064 | xenotropic and polytropic retrovirus receptor 1-like, partial [Ostrinia furnacalis]              | -1.23 | 7.15e-05 | 1.73e-03 |
| ncbi_114351300 | mucin-5AC-like isoform X1 [Ostrinia furnacalis]                                                  | +5.02 | 1.04e-26 | 3.07e-23 |
| ncbi_114351333 | caspase Drnc [Ostrinia furnacalis]                                                               | -1.07 | 1.05e-03 | 1.32e-02 |
| ncbi_114351347 | Gag-pol polyprotein [Operophtera brumata]                                                        | +2.97 | 1.53e-03 | 1.75e-02 |
| ncbi_114351356 | AGAP003808-PA [Anopheles gambiae str. PEST] [Anopheles gambiae]                                  | -1.46 | 6.40e-03 | 4.97e-02 |
| ncbi_114351397 | kunitz-type U19-barytoxin-T11a-like isoform X1 [Ostrinia furnacalis]                             | +1.31 | 5.48e-06 | 2.26e-04 |
| ncbi_114351477 | succinyl-CoA:3-ketoacid coenzyme A transferase 1, mitochondrial [Ostrinia furnacalis]            | -1.01 | 2.07e-06 | 1.02e-04 |

|                |                                                                                            |       |          |          |
|----------------|--------------------------------------------------------------------------------------------|-------|----------|----------|
| ncbi_114351540 | kinesin-like protein KIF18A isoform X1 [Ostrinia furnacalis]                               | -1.02 | 3.19e-03 | 3.02e-02 |
| ncbi_114351572 | Zinc finger DNA binding protein [Operophtera brumata]                                      | -2.94 | 3.67e-11 | 8.81e-09 |
| ncbi_114351648 | AAEL012860-PA [Aedes aegypti]                                                              | +1.48 | 5.45e-06 | 2.25e-04 |
| ncbi_114351652 | PREDICTED: alpha-glucosidase 2-like [Papilio xuthus]                                       | -1.35 | 9.85e-06 | 3.58e-04 |
| ncbi_114351683 | Apolipophorin [Papilio xuthus]                                                             | -2.24 | 2.27e-06 | 1.08e-04 |
| ncbi_114351695 | voltage-dependent calcium channel subunit alpha-2/delta-3 isoform X1 [Ostrinia furnacalis] | -5.13 | 2.05e-03 | 2.18e-02 |
| ncbi_114351743 | mitochondrial enolase superfamily member 1-like [Ostrinia furnacalis]                      | -1.28 | 3.47e-04 | 5.69e-03 |
| ncbi_114351758 | Sortilin-related receptor [Papilio xuthus]                                                 | +1.27 | 4.30e-03 | 3.72e-02 |
| ncbi_114351915 | transmembrane protease serine 9-like [Ostrinia furnacalis]                                 | +1.07 | 5.74e-11 | 1.33e-08 |
| ncbi_114351936 | trypsin, alkaline C-like isoform X1 [Ostrinia furnacalis]                                  | +1.29 | 1.64e-07 | 1.33e-05 |
| ncbi_114351939 | trypsin, alkaline C-like [Ostrinia furnacalis]                                             | +1.33 | 2.86e-08 | 3.15e-06 |
| ncbi_114351953 | monocarboxylate transporter 9-like [Ostrinia furnacalis]                                   | -2.15 | 6.74e-05 | 1.66e-03 |
| ncbi_114351970 | mucin-5AC-like [Ostrinia furnacalis]                                                       | -4.44 | 5.95e-07 | 3.77e-05 |
| ncbi_114352033 | CD109 antigen-like [Ostrinia furnacalis]                                                   | +1.13 | 9.72e-04 | 1.25e-02 |
| ncbi_114352176 | myosin-binding protein H-like [Bombyx mandarina]                                           | -1.11 | 3.19e-07 | 2.21e-05 |
| ncbi_114352248 | WD repeat-containing protein 7-like [Ostrinia furnacalis]                                  | -1.19 | 1.89e-03 | 2.05e-02 |
| ncbi_114352314 | tigger transposable element-derived protein 6-like isoform X1 [Manduca sexta]              | -5.35 | 5.00e-18 | 5.36e-15 |
| ncbi_114352315 | Integrase catalytic domain-containing protein [Aphis craccivora]                           | +2.37 | 7.48e-12 | 2.15e-09 |
| ncbi_114352321 | delta(24)-sterol reductase-like isoform X2 [Ostrinia furnacalis]                           | +1.37 | 5.27e-13 | 2.39e-10 |
| ncbi_114352435 | ras GTPase-activating protein 1-like [Ostrinia furnacalis]                                 | -1.02 | 1.46e-03 | 1.70e-02 |
| ncbi_114352487 | collagenase-like [Ostrinia furnacalis]                                                     | +1.18 | 2.15e-18 | 2.53e-15 |
| ncbi_114352553 | trypsin, alkaline A-like [Ostrinia furnacalis]                                             | +2.29 | 4.01e-04 | 6.39e-03 |
| ncbi_114352599 | RING finger protein 145 [Papilio xuthus]                                                   | -1.22 | 6.24e-04 | 8.84e-03 |
| ncbi_114352631 | UDP-glucuronosyltransferase 2B15-like [Ostrinia furnacalis]                                | +7.07 | 2.98e-07 | 2.10e-05 |
| ncbi_114352700 | pickpocket protein 28-like isoform X1 [Aphis craccivora]                                   | -5.27 | 7.74e-06 | 2.97e-04 |

|                |                                                                              |       |          |          |
|----------------|------------------------------------------------------------------------------|-------|----------|----------|
| ncbi_114352709 | zinc finger protein 468-like [Ostrinia furnacalis]                           | -1.45 | 4.19e-03 | 3.66e-02 |
| ncbi_114352740 | SMC domain protein [Heliothis subflexa]                                      | -6.43 | 3.79e-06 | 1.67e-04 |
| ncbi_114352770 | ommochrome-binding protein-like [Spodoptera litura]                          | -1.23 | 2.53e-03 | 2.54e-02 |
| ncbi_114352777 | protein lethal(2)essential for life-like [Ostrinia furnacalis]               | -2.55 | 2.38e-04 | 4.34e-03 |
| ncbi_114352796 | uncharacterized protein LOC114352796 [Ostrinia furnacalis]                   | +2.16 | 3.84e-03 | 3.44e-02 |
| ncbi_114352816 | proline-rich extensin-like protein EPR1 isoform X1 [Ostrinia furnacalis]     | -1.01 | 6.42e-04 | 9.05e-03 |
| ncbi_114352834 | ATP-dependent RNA helicase DDX54 [Ostrinia furnacalis]                       | +1.17 | 1.55e-06 | 7.81e-05 |
| ncbi_114352883 | alpha-tocopherol transfer protein-like [Ostrinia furnacalis]                 | +2.03 | 9.50e-05 | 2.14e-03 |
| ncbi_114352885 | probable kinetochore protein NDC80 [Bicyclus anynana]                        | -3.61 | 1.03e-06 | 5.54e-05 |
| ncbi_114352903 | L-lactate dehydrogenase B chain-like [Ostrinia furnacalis]                   | -7.57 | 4.19e-04 | 6.60e-03 |
| ncbi_114352955 | nicotinic acid-CoA ligase pyr1-like [Ostrinia furnacalis]                    | +1.12 | 3.46e-07 | 2.34e-05 |
| ncbi_114352982 | piggyBac transposable element-derived protein 4-like [Ostrinia furnacalis]   | -1.55 | 1.23e-03 | 1.48e-02 |
| ncbi_114352989 | retinal-specific ATP-binding cassette transporter-like [Ostrinia furnacalis] | +3.10 | 1.66e-05 | 5.44e-04 |
| ncbi_114353006 | serine hydrolase-like protein [Ostrinia furnacalis]                          | +1.43 | 1.38e-06 | 7.11e-05 |
| ncbi_114353036 | polyprotein [Antheraea mylitta]                                              | +1.30 | 1.29e-06 | 6.77e-05 |
| ncbi_114353077 | cytochrome P450 9e2-like [Ostrinia furnacalis]                               | -2.52 | 9.89e-05 | 2.20e-03 |
| ncbi_114353086 | Cytochrome P450 9e2 [Papilio xuthus]                                         | -1.35 | 2.31e-08 | 2.57e-06 |
| ncbi_114353206 | lipase member I-like [Ostrinia furnacalis]                                   | -1.85 | 3.73e-03 | 3.37e-02 |
| ncbi_114353277 | pancreatic lipase-related protein 2-like [Ostrinia furnacalis]               | +1.81 | 1.82e-03 | 2.00e-02 |
| ncbi_114353390 | synaptic vesicle glycoprotein 2C-like isoform X1 [Ostrinia furnacalis]       | -1.86 | 1.73e-03 | 1.92e-02 |
| ncbi_114353417 | synaptotagmin 1 isoform X1 [Ostrinia furnacalis]                             | -1.12 | 1.01e-04 | 2.23e-03 |
| ncbi_114353454 | probable cytochrome P450 301a1, mitochondrial [Ostrinia furnacalis]          | -1.72 | 4.13e-05 | 1.11e-03 |
| ncbi_114353474 | neutral ceramidase, partial [Ostrinia furnacalis]                            | -1.59 | 5.30e-04 | 7.87e-03 |
| ncbi_114353522 | synaptic vesicle glycoprotein 2A-like [Ostrinia furnacalis]                  | -1.34 | 1.59e-05 | 5.25e-04 |
| ncbi_114353646 | testis-expressed protein 10-like [Ostrinia furnacalis]                       | +1.14 | 9.68e-04 | 1.24e-02 |

|                |                                                                                              |        |          |          |
|----------------|----------------------------------------------------------------------------------------------|--------|----------|----------|
| ncbi_114353653 | protein maternal effect lethal 26-like [Ostrinia furnacalis]                                 | -1.33  | 3.46e-06 | 1.56e-04 |
| ncbi_114353764 | protein lethal(2)essential for life-like [Ostrinia furnacalis]                               | -1.50  | 1.74e-12 | 6.22e-10 |
| ncbi_114353955 | uncharacterized protein LOC114353955 [Ostrinia furnacalis]                                   | +10.92 | 1.22e-04 | 2.60e-03 |
| ncbi_114354032 | protein PFC0760c-like [Vanessa tameamea]                                                     | -1.77  | 2.43e-04 | 4.41e-03 |
| ncbi_114354065 | solute carrier family 2, facilitated glucose transporter member 1-like [Ostrinia furnacalis] | -3.34  | 4.27e-04 | 6.67e-03 |
| ncbi_114354101 | laccase-2 [Ostrinia furnacalis]                                                              | -2.44  | 5.26e-03 | 4.31e-02 |
| ncbi_114354259 | heat shock protein 68-like [Ostrinia furnacalis]                                             | -2.32  | 6.31e-16 | 5.31e-13 |
| ncbi_114354277 | facilitated trehalose transporter Tret1-like [Ostrinia furnacalis]                           | -2.49  | 6.30e-03 | 4.91e-02 |
| ncbi_114354284 | PREDICTED: cilia- and flagella-associated protein 45-like [Papilio machaon]                  | -4.53  | 1.12e-03 | 1.39e-02 |
| ncbi_114354285 | ATP-binding cassette sub-family G member 5 isoform X1 [Ostrinia furnacalis]                  | -2.60  | 4.92e-04 | 7.42e-03 |
| ncbi_114354289 | multidrug resistance-associated protein 4-like [Ostrinia furnacalis]                         | -1.71  | 4.25e-04 | 6.65e-03 |
| ncbi_114354309 | multidrug resistance-associated protein 4-like [Galleria mellonella]                         | -9.37  | 5.80e-07 | 3.69e-05 |
| ncbi_114354320 | very-long-chain (3R)-3-hydroxyacyl-CoA dehydratase hpo-8 [Ostrinia furnacalis]               | -1.01  | 4.83e-06 | 2.03e-04 |
| ncbi_114354442 | acetylcholine receptor subunit alpha-like [Ostrinia furnacalis]                              | +3.01  | 4.31e-03 | 3.72e-02 |
| ncbi_114354545 | Reverse transcriptase and recombinase [Operophtera brumata]                                  | -1.60  | 1.33e-03 | 1.57e-02 |
| ncbi_114354689 | cell wall protein DAN4-like [Hyposmocoma kahamanoa]                                          | -4.83  | 2.31e-03 | 2.37e-02 |
| ncbi_114354720 | next to BRCA1 gene 1 protein-like isoform X1 [Ostrinia furnacalis]                           | -1.53  | 5.74e-10 | 9.98e-08 |
| ncbi_114354721 | protein lethal(2)essential for life-like [Ostrinia furnacalis]                               | -1.57  | 8.10e-11 | 1.77e-08 |
| ncbi_114354725 | heat shock protein 68-like [Ostrinia furnacalis]                                             | -3.26  | 3.00e-08 | 3.26e-06 |
| ncbi_114354966 | tyramine receptor 1 [Ostrinia furnacalis]                                                    | +1.54  | 4.43e-03 | 3.78e-02 |
| ncbi_114355040 | Uncharacterized 50 kDa protein in type I retrotransposable element R1DM [Eumeta japonica]    | -1.40  | 5.29e-04 | 7.85e-03 |
| ncbi_114355095 | GDP-fucose protein O-fucosyltransferase 2-like [Ostrinia furnacalis]                         | -1.02  | 3.81e-03 | 3.42e-02 |
| ncbi_114355216 | fat-like cadherin-related tumor suppressor homolog [Spodoptera litura]                       | -1.17  | 8.45e-09 | 1.04e-06 |
| ncbi_114355250 | uncharacterized protein LOC114355250, partial [Ostrinia furnacalis]                          | +2.24  | 1.76e-03 | 1.95e-02 |
| ncbi_114355390 | protein kinase C isoform X2 [Ostrinia furnacalis]                                            | -1.45  | 2.80e-03 | 2.75e-02 |

|                |                                                                                             |       |          |          |
|----------------|---------------------------------------------------------------------------------------------|-------|----------|----------|
| ncbi_114355439 | Integrase catalytic domain-containing protein, partial [ <i>Aphis craccivora</i> ]          | -3.73 | 3.05e-05 | 8.61e-04 |
| ncbi_114355467 | trypsin, alkaline C-like [ <i>Ostrinia furnacalis</i> ]                                     | +2.54 | 2.68e-04 | 4.76e-03 |
| ncbi_114355559 | fungal protease inhibitor-1-like [ <i>Ostrinia furnacalis</i> ]                             | -1.60 | 3.15e-03 | 2.99e-02 |
| ncbi_114355671 | inter-alpha-trypsin inhibitor heavy chain H4-like isoform X1 [ <i>Ostrinia furnacalis</i> ] | -1.06 | 2.39e-03 | 2.44e-02 |
| ncbi_114355715 | C-type lectin [ <i>Heliothis virescens</i> ]                                                | +1.68 | 3.44e-03 | 3.19e-02 |
| ncbi_114355741 | Integrase catalytic domain-containing protein [ <i>Aphis craccivora</i> ]                   | -1.84 | 2.05e-11 | 5.03e-09 |
| ncbi_114355779 | Retrovirus-related Pol polyprotein from transposon 297 [ <i>Eumeta japonica</i> ]           | -3.93 | 1.60e-05 | 5.28e-04 |
| ncbi_114355780 | Zinc finger DNA binding protein [ <i>Operophtera brumata</i> ]                              | -5.48 | 9.76e-13 | 3.83e-10 |
| ncbi_114355784 | transcription factor Sox-12-like [ <i>Ostrinia furnacalis</i> ]                             | -1.54 | 3.02e-08 | 3.26e-06 |
| ncbi_114355894 | Armadillo-type fold,Armadillo-like helical [ <i>Cinara cedri</i> ]                          | -1.77 | 1.00e-03 | 1.28e-02 |
| ncbi_114355939 | Mutant cadherin [ <i>Operophtera brumata</i> ]                                              | +1.32 | 1.34e-03 | 1.59e-02 |
| ncbi_114355963 | kynurenine formamidase isoform X1 [ <i>Ostrinia furnacalis</i> ]                            | -1.09 | 1.70e-08 | 1.96e-06 |
| ncbi_114355992 | Retrovirus-related Pol polyprotein from transposon 412 [ <i>Eumeta japonica</i> ]           | +3.05 | 8.38e-05 | 1.95e-03 |
| ncbi_114356144 | trypsin-like [ <i>Ostrinia furnacalis</i> ]                                                 | -1.13 | 4.24e-03 | 3.68e-02 |
| ncbi_114356174 | Zinc finger DNA binding protein [ <i>Operophtera brumata</i> ]                              | -1.39 | 1.70e-04 | 3.39e-03 |
| ncbi_114356221 | heat shock protein 68-like [ <i>Ostrinia furnacalis</i> ]                                   | -1.56 | 2.53e-15 | 1.57e-12 |
| ncbi_114356222 | protein lethal(2)essential for life-like [ <i>Ostrinia furnacalis</i> ]                     | -2.68 | 1.62e-05 | 5.34e-04 |
| ncbi_114356285 | histone acetyltransferase KAT6A-like [ <i>Manduca sexta</i> ]                               | -7.54 | 1.86e-03 | 2.02e-02 |
| ncbi_114356356 | uncharacterized protein LOC114356356 [ <i>Ostrinia furnacalis</i> ]                         | -1.43 | 2.63e-05 | 7.80e-04 |
| ncbi_114356426 | flexible cuticle protein 12-like [ <i>Ostrinia furnacalis</i> ]                             | +2.24 | 1.43e-08 | 1.72e-06 |
| ncbi_114356505 | ankyrin3 [ <i>Culex quinquefasciatus</i> ]                                                  | -1.11 | 1.27e-09 | 2.03e-07 |
| ncbi_114356515 | optineurin isoform X1 [ <i>Ostrinia furnacalis</i> ]                                        | -1.05 | 1.29e-06 | 6.77e-05 |
| ncbi_114356554 | DNA-directed RNA polymerase I subunit RPA2 [ <i>Ostrinia furnacalis</i> ]                   | +1.30 | 9.14e-07 | 5.10e-05 |
| ncbi_114356560 | zinc finger HIT domain-containing protein 2 [ <i>Trichoplusia ni</i> ]                      | -1.68 | 1.63e-03 | 1.84e-02 |
| ncbi_114356594 | RNA exonuclease 5 [ <i>Ostrinia furnacalis</i> ]                                            | -1.01 | 1.13e-03 | 1.40e-02 |

|                |                                                                                                            |       |          |          |
|----------------|------------------------------------------------------------------------------------------------------------|-------|----------|----------|
| ncbi_114356609 | oxidative stress-responsive serine-rich protein 1 [Helicoverpa armigera]                                   | -1.35 | 3.08e-04 | 5.21e-03 |
| ncbi_114356611 | formin-A-like [Ostrinia furnacalis]                                                                        | +2.62 | 5.19e-03 | 4.26e-02 |
| ncbi_114356687 | PREDICTED: RNA-directed DNA polymerase from mobile element jockey-like isoform X1 [Amyeloidis transitella] | +2.80 | 1.32e-03 | 1.57e-02 |
| ncbi_114356758 | sorting nexin-4-like isoform X1 [Ostrinia furnacalis]                                                      | -1.04 | 2.37e-07 | 1.76e-05 |
| ncbi_114356863 | ORF [Drosophila melanogaster]                                                                              | -1.21 | 3.08e-03 | 2.94e-02 |
| ncbi_114356943 | Gag-pol polyprotein [Operophtera brumata]                                                                  | +2.05 | 1.92e-04 | 3.71e-03 |
| ncbi_114356982 | Jerky-like, partial [Aphis craccivora]                                                                     | -3.58 | 3.67e-03 | 3.34e-02 |
| ncbi_114357156 | lipid droplet localized protein-like [Ostrinia furnacalis]                                                 | -3.24 | 4.38e-03 | 3.76e-02 |
| ncbi_114357161 | organic cation transporter protein-like, partial [Ostrinia furnacalis]                                     | +1.03 | 2.88e-05 | 8.37e-04 |
| ncbi_114357207 | uncharacterized protein LOC114357207 [Ostrinia furnacalis]                                                 | -1.23 | 1.02e-03 | 1.29e-02 |
| ncbi_114357236 | zinc finger DNA binding protein [Danaus plexippus plexippus]                                               | -2.26 | 1.66e-06 | 8.30e-05 |
| ncbi_114357237 | probable sodium-coupled neutral amino acid transporter 6 [Ostrinia furnacalis]                             | +1.65 | 1.11e-04 | 2.41e-03 |
| ncbi_114357324 | secretory phospholipase A2 receptor-like [Ostrinia furnacalis]                                             | -5.52 | 6.12e-04 | 8.73e-03 |
| ncbi_114357385 | nucleolar protein 58 [Ostrinia furnacalis]                                                                 | +1.06 | 2.28e-10 | 4.32e-08 |
| ncbi_114357436 | Reverse transcriptase and recombinase [Operophtera brumata]                                                | -5.41 | 3.74e-03 | 3.37e-02 |
| ncbi_114357451 | organic cation transporter protein-like [Ostrinia furnacalis]                                              | -2.36 | 5.30e-28 | 2.08e-24 |
| ncbi_114357498 | Gag-pol polyprotein [Operophtera brumata]                                                                  | +1.03 | 1.08e-03 | 1.35e-02 |
| ncbi_114357556 | Integrase catalytic domain-containing protein, partial [Aphis craccivora]                                  | -2.97 | 2.46e-03 | 2.49e-02 |
| ncbi_114357558 | sulfotransferase family cytosolic 1B member 1-like [Ostrinia furnacalis]                                   | +1.28 | 5.67e-05 | 1.43e-03 |
| ncbi_114357580 | trans-1,2-dihydrobenzene-1,2-diol dehydrogenase-like isoform X3 [Ostrinia furnacalis]                      | +2.65 | 2.76e-04 | 4.86e-03 |
| ncbi_114357591 | Integrase catalytic domain-containing protein, partial [Aphis craccivora]                                  | +1.65 | 2.44e-04 | 4.42e-03 |
| ncbi_114357630 | Pogo transposable element with KRAB domain [Papilio machaon]                                               | -2.61 | 8.44e-08 | 7.71e-06 |
| ncbi_114357743 | protein NYNRIN-like [Hypomocoma kahamanoa]                                                                 | -2.66 | 7.28e-12 | 2.14e-09 |
| ncbi_114357777 | cAMP and cAMP-inhibited cGMP 3',5'-cyclic phosphodiesterase 10A-like [Ostrinia furnacalis]                 | -3.06 | 9.09e-04 | 1.18e-02 |



|                |                                                                                        |       |          |          |
|----------------|----------------------------------------------------------------------------------------|-------|----------|----------|
| ncbi_114357858 | A disintegrin and metalloproteinase with thrombospondin motifs 7 [Ostrinia furnacalis] | +1.40 | 3.27e-12 | 1.07e-09 |
| ncbi_114357864 | testisin [Ostrinia furnacalis]                                                         | +2.38 | 9.72e-04 | 1.25e-02 |
| ncbi_114357904 | Retrovirus-related Pol polyprotein from transposon opus [Eumeta japonica]              | -2.55 | 2.07e-04 | 3.90e-03 |
| ncbi_114357933 | sorting nexin-2 [Ostrinia furnacalis]                                                  | -1.05 | 2.19e-09 | 3.26e-07 |
| ncbi_114357956 | DNA polymerase nu-like [Helicoverpa armigera]                                          | -3.35 | 6.82e-05 | 1.67e-03 |
| ncbi_114357985 | toll-like receptor 6 [Ostrinia furnacalis]                                             | -1.31 | 1.04e-10 | 2.18e-08 |
| ncbi_114358032 | sulfotransferase family cytosolic 1B member 1-like [Ostrinia furnacalis]               | +3.01 | 2.40e-06 | 1.13e-04 |
| ncbi_114358252 | NADPH oxidase 5, partial [Ostrinia furnacalis]                                         | -5.28 | 1.33e-04 | 2.79e-03 |
| ncbi_114358258 | ATP-sensitive inward rectifier potassium channel 1-like [Ostrinia furnacalis]          | -1.62 | 6.00e-10 | 1.02e-07 |
| ncbi_114358284 | synaptonemal complex protein 1-like [Ostrinia furnacalis]                              | -2.92 | 3.91e-03 | 3.48e-02 |
| ncbi_114358317 | reticulocyte-binding protein 2 homolog a-like [Bombyx mandarina]                       | -1.60 | 1.52e-03 | 1.74e-02 |
| ncbi_114358381 | GATA zinc finger domain-containing protein 10-like [Spodoptera litura]                 | +2.03 | 2.56e-03 | 2.56e-02 |
| ncbi_114358382 | protein lethal(2)essential for life-like [Ostrinia furnacalis]                         | -2.36 | 1.99e-16 | 1.81e-13 |
| ncbi_114358386 | protein lethal(2)essential for life-like [Ostrinia furnacalis]                         | -1.48 | 1.52e-09 | 2.36e-07 |
| ncbi_114358387 | protein lethal(2)essential for life-like [Ostrinia furnacalis]                         | -1.82 | 6.41e-20 | 1.26e-16 |
| ncbi_114358448 | Endonuclease-reverse transcriptase [Operophtera brumata]                               | -2.43 | 4.43e-08 | 4.24e-06 |
| ncbi_114358494 | attacin-like [Ostrinia furnacalis]                                                     | +2.51 | 3.41e-03 | 3.17e-02 |
| ncbi_114358595 | Integrase catalytic domain-containing protein [Aphis craccivora]                       | +3.97 | 4.21e-04 | 6.61e-03 |
| ncbi_114358601 | CLUMA_CG019058, isoform A [Clunio marinus]                                             | -1.72 | 2.19e-04 | 4.06e-03 |
| ncbi_114358603 | phospholipase A1 VesT1.02-like [Ostrinia furnacalis]                                   | -1.02 | 5.79e-03 | 4.61e-02 |
| ncbi_114358606 | sulfotransferase family cytosolic 1B member 1-like [Ostrinia furnacalis]               | -1.20 | 1.74e-06 | 8.62e-05 |
| ncbi_114358612 | testis-expressed protein 2 [Galleria mellonella]                                       | -1.08 | 4.47e-09 | 6.13e-07 |
| ncbi_114358650 | YqaJ domain-containing protein [Aphis craccivora]                                      | +9.18 | 3.52e-07 | 2.37e-05 |
| ncbi_114358671 | reverse transcriptase [Anopheles gambiae]                                              | -1.17 | 1.30e-03 | 1.55e-02 |
| ncbi_114358690 | collagenase-like [Ostrinia furnacalis]                                                 | +1.73 | 4.65e-13 | 2.19e-10 |

|                |                                                                                                 |       |          |          |
|----------------|-------------------------------------------------------------------------------------------------|-------|----------|----------|
| ncbi_114358723 | collagenase-like [Ostrinia furnacalis]                                                          | +1.44 | 1.31e-16 | 1.28e-13 |
| ncbi_114358734 | collagenase-like [Ostrinia furnacalis]                                                          | +1.26 | 3.25e-09 | 4.72e-07 |
| ncbi_114358757 | PREDICTED: RNA-directed DNA polymerase from mobile element jockey-like [Amyeloides transitella] | +1.57 | 6.71e-04 | 9.33e-03 |
| ncbi_114358775 | larval cuticle protein LCP-17-like [Ostrinia furnacalis]                                        | +1.86 | 3.90e-09 | 5.53e-07 |
| ncbi_114358820 | ATP-dependent DNA helicase PIF1 [Eumeta japonica]                                               | -1.39 | 3.35e-03 | 3.13e-02 |
| ncbi_114358879 | uncharacterized protein LOC114358879 [Ostrinia furnacalis]                                      | +1.37 | 5.76e-10 | 9.98e-08 |
| ncbi_114358890 | Envelope fusion protein-like Protein [Tribolium castaneum]                                      | -1.37 | 1.52e-06 | 7.80e-05 |
| ncbi_114358899 | lysoplasmalogenase [Ostrinia furnacalis]                                                        | -1.37 | 4.60e-03 | 3.88e-02 |
| ncbi_114359071 | Pro-Pol polyprotein [Folsomia candida]                                                          | +4.84 | 2.63e-04 | 4.70e-03 |
| ncbi_114359074 | carboxypeptidase B-like [Ostrinia furnacalis]                                                   | +1.00 | 1.72e-07 | 1.39e-05 |
| ncbi_114359077 | carboxypeptidase B-like [Ostrinia furnacalis]                                                   | +1.07 | 1.58e-05 | 5.23e-04 |
| ncbi_114359082 | peptide transporter family 1-like [Ostrinia furnacalis]                                         | -1.41 | 9.88e-07 | 5.39e-05 |
| ncbi_114359083 | carboxypeptidase B-like [Ostrinia furnacalis]                                                   | -1.13 | 9.57e-05 | 2.15e-03 |
| ncbi_114359099 | saccharopine dehydrogenase-like oxidoreductase [Ostrinia furnacalis]                            | -3.87 | 3.32e-13 | 1.63e-10 |
| ncbi_114359229 | proton-coupled folate transporter-like [Ostrinia furnacalis]                                    | -1.34 | 4.83e-03 | 4.02e-02 |
| ncbi_114359336 | polyprotein [Antheraea mylitta]                                                                 | +1.67 | 1.34e-11 | 3.42e-09 |
| ncbi_114359399 | sarcoplasmic calcium-binding proteins I, III, and IV-like, partial [Nilaparvata lugens]         | -1.23 | 1.12e-10 | 2.27e-08 |
| ncbi_114359533 | Pre-mRNA-processing factor 17 [Operophtera brumata]                                             | +3.21 | 1.80e-03 | 1.98e-02 |
| ncbi_114359657 | shavenoid [Papilio xuthus]                                                                      | -3.40 | 6.26e-07 | 3.92e-05 |
| ncbi_114359671 | arylphorin subunit alpha-like [Ostrinia furnacalis]                                             | -6.70 | 6.15e-03 | 4.82e-02 |
| ncbi_114359766 | zinc metalloproteinase nas-13-like [Ostrinia furnacalis]                                        | +1.29 | 5.72e-06 | 2.29e-04 |
| ncbi_114359791 | calsequestrin-1-like [Spodoptera litura]                                                        | -4.74 | 9.14e-06 | 3.40e-04 |
| ncbi_114359847 | tektin-3-like isoform X1 [Ostrinia furnacalis]                                                  | +5.10 | 3.37e-04 | 5.55e-03 |
| ncbi_114359874 | gamma-glutamyl hydrolase-like [Ostrinia furnacalis]                                             | -2.18 | 2.09e-05 | 6.47e-04 |
| ncbi_114359889 | annulin-like isoform X1 [Ostrinia furnacalis]                                                   | -2.32 | 2.79e-04 | 4.89e-03 |

|                |                                                                                            |        |          |          |
|----------------|--------------------------------------------------------------------------------------------|--------|----------|----------|
| ncbi_114360063 | piggyBac transposable element-derived protein 3-like, partial [Danaus plexippus plexippus] | +1.60  | 6.64e-05 | 1.64e-03 |
| ncbi_114360122 | epidermal retinol dehydrogenase 2-like [Ostrinia furnacalis]                               | -1.06  | 1.67e-04 | 3.35e-03 |
| ncbi_114360123 | short-chain dehydrogenase/reductase family 16C member 6 [Ostrinia furnacalis]              | -4.23  | 3.90e-07 | 2.58e-05 |
| ncbi_114360125 | MORN repeat-containing protein 4-like isoform X1 [Ostrinia furnacalis]                     | -2.29  | 9.18e-07 | 5.10e-05 |
| ncbi_114360162 | 1-acyl-sn-glycerol-3-phosphate acyltransferase beta-like [Ostrinia furnacalis]             | -1.12  | 5.10e-05 | 1.31e-03 |
| ncbi_114360250 | Integrase catalytic domain-containing protein, partial [Aphis craccivora]                  | -1.97  | 7.57e-04 | 1.02e-02 |
| ncbi_114360251 | Gag-pol polyprotein [Operophtera brumata]                                                  | -1.30  | 2.79e-04 | 4.89e-03 |
| ncbi_114360286 | Retrovirus-related Pol polyprotein from transposon 297 [Eumeta japonica]                   | -10.16 | 2.54e-04 | 4.58e-03 |
| ncbi_114360325 | alpha-scruin [Bicyclus anynana]                                                            | -2.21  | 8.70e-06 | 3.26e-04 |
| ncbi_114360387 | torso-like protein isoform X5 [Ostrinia furnacalis]                                        | -1.22  | 9.68e-05 | 2.16e-03 |
| ncbi_114360401 | conserved oligomeric Golgi complex subunit 7 [Ostrinia furnacalis]                         | +1.67  | 1.51e-04 | 3.09e-03 |
| ncbi_114360499 | trypsin, alkaline A-like [Ostrinia furnacalis]                                             | +10.67 | 3.10e-04 | 5.24e-03 |
| ncbi_114360511 | esterase FE4-like [Ostrinia furnacalis]                                                    | -3.37  | 4.26e-03 | 3.70e-02 |
| ncbi_114360532 | retinol-binding protein [Culex quinquefasciatus]                                           | +2.58  | 4.84e-03 | 4.02e-02 |
| ncbi_114360624 | eukaryotic translation initiation factor 4E-like [Ostrinia furnacalis]                     | -1.21  | 7.69e-09 | 9.67e-07 |
| ncbi_114360773 | glutathione S-transferase 1-like [Ostrinia furnacalis]                                     | +2.75  | 1.46e-13 | 8.12e-11 |
| ncbi_114360790 | venom serine carboxypeptidase [Ostrinia furnacalis]                                        | +1.30  | 3.47e-12 | 1.10e-09 |
| ncbi_114360800 | gag-pol polyprotein precursor [Lasius niger]                                               | +2.33  | 4.41e-03 | 3.77e-02 |
| ncbi_114360807 | chymotrypsin-like elastase family member 2A [Ostrinia furnacalis]                          | -1.27  | 1.78e-04 | 3.48e-03 |
| ncbi_114360825 | calphotin-like [Ostrinia furnacalis]                                                       | -1.31  | 2.41e-19 | 4.05e-16 |
| ncbi_114360831 | ankyrin repeat and LEM domain-containing protein 1-like isoform X1 [Galleria mellonella]   | -1.12  | 3.26e-07 | 2.25e-05 |
| ncbi_114360837 | coatomer subunit epsilon-like [Ostrinia furnacalis]                                        | -1.01  | 8.08e-04 | 1.07e-02 |
| ncbi_114360920 | lachesin-like [Ostrinia furnacalis]                                                        | -3.63  | 1.99e-03 | 2.13e-02 |
| ncbi_114360950 | ORF1p [Operophtera brumata]                                                                | -1.27  | 6.10e-04 | 8.73e-03 |
| ncbi_114361117 | collagen alpha-1(III) chain-like [Ostrinia furnacalis]                                     | +1.54  | 5.80e-03 | 4.61e-02 |

|                |                                                                                          |       |          |          |
|----------------|------------------------------------------------------------------------------------------|-------|----------|----------|
| ncbi_114361136 | uncharacterized protein LOC114361136 [Ostrinia furnacalis]                               | -1.08 | 6.07e-06 | 2.41e-04 |
| ncbi_114361175 | tyrosine-protein kinase Src64B-like [Ostrinia furnacalis]                                | -1.08 | 3.06e-04 | 5.20e-03 |
| ncbi_114361190 | rho guanine nucleotide exchange factor 5 isoform X1 [Trichoplusia ni]                    | -1.08 | 2.14e-07 | 1.63e-05 |
| ncbi_114361273 | alpha,alpha-trehalose-phosphate synthase [UDP-forming] [Ostrinia furnacalis]             | +1.01 | 3.25e-04 | 5.38e-03 |
| ncbi_114361322 | CD63 antigen-like [Ostrinia furnacalis]                                                  | -1.28 | 3.36e-03 | 3.14e-02 |
| ncbi_114361430 | blastopia polypeptide [Lasius niger]                                                     | -1.42 | 4.78e-03 | 3.99e-02 |
| ncbi_114361495 | luciferin 4-monooxygenase-like isoform X1 [Ostrinia furnacalis]                          | -3.78 | 4.15e-03 | 3.63e-02 |
| ncbi_114361498 | PREDICTED: RNA-directed DNA polymerase from mobile element jockey-like [Papilio machaon] | +1.95 | 9.90e-06 | 3.59e-04 |
| ncbi_114361500 | nephrin-like [Ostrinia furnacalis]                                                       | +1.33 | 1.39e-05 | 4.69e-04 |
| ncbi_114361507 | PREDICTED: probable salivary secreted peptide [Amyelois transitella]                     | +1.00 | 8.11e-05 | 1.89e-03 |
| ncbi_114361580 | heat shock protein Hsp-12.2-like [Ostrinia furnacalis]                                   | -2.85 | 3.41e-30 | 2.01e-26 |
| ncbi_114361602 | Microtubule binding protein, partial [Operophtera brumata]                               | +2.34 | 1.16e-03 | 1.43e-02 |
| ncbi_114361606 | dual specificity protein phosphatase 23-like isoform X1 [Ostrinia furnacalis]            | -2.30 | 7.77e-04 | 1.05e-02 |
| ncbi_114361691 | speckle-type POZ protein-like isoform X1 [Ostrinia furnacalis]                           | -1.16 | 5.37e-03 | 4.37e-02 |
| ncbi_114361809 | thrombospondin type-1 domain-containing protein 7A-like [Ostrinia furnacalis]            | -3.81 | 2.95e-03 | 2.86e-02 |
| ncbi_114361890 | PREDICTED: hemicentin-1-like [Plutella xylostella]                                       | +3.72 | 4.80e-03 | 4.00e-02 |
| ncbi_114362061 | protein turtle-like [Ostrinia furnacalis]                                                | +3.91 | 1.59e-10 | 3.13e-08 |
| ncbi_114362092 | trichohyalin-like [Trichoplusia ni]                                                      | -1.21 | 1.09e-09 | 1.76e-07 |
| ncbi_114362108 | furin-like protease 1, partial [Ostrinia furnacalis]                                     | -1.08 | 9.23e-12 | 2.59e-09 |
| ncbi_114362189 | proline-rich extensin-like protein EPR1 [Galleria mellonella]                            | -1.53 | 3.72e-06 | 1.65e-04 |
| ncbi_114362207 | Integrase catalytic domain-containing protein, partial [Aphis craccivora]                | -1.73 | 1.45e-05 | 4.86e-04 |
| ncbi_114362231 | Efflux transporter, RND family, partial [Operophtera brumata]                            | +4.70 | 4.39e-03 | 3.76e-02 |
| ncbi_114362367 | MyD88 [Spodoptera frugiperda]                                                            | -1.10 | 9.40e-07 | 5.17e-05 |
| ncbi_114362382 | Cytochrome c oxidase polypeptide Vb [Operophtera brumata]                                | -3.90 | 4.46e-09 | 6.13e-07 |
| ncbi_114362427 | activin receptor type-1-like, partial [Ostrinia furnacalis]                              | -1.07 | 1.20e-03 | 1.46e-02 |

|                |                                                                                    |       |          |          |
|----------------|------------------------------------------------------------------------------------|-------|----------|----------|
| ncbi_114362441 | DNA-directed RNA polymerase II subunit GRINL1A [Ostrinia furnacalis]               | -1.07 | 4.75e-06 | 2.02e-04 |
| ncbi_114362465 | adenosine kinase [Ostrinia furnacalis]                                             | +1.00 | 2.55e-07 | 1.86e-05 |
| ncbi_114362479 | uncharacterized protein LOC114362479 [Ostrinia furnacalis]                         | +5.35 | 5.99e-03 | 4.72e-02 |
| ncbi_114362482 | Pro-Pol polyprotein [Folsomia candida]                                             | +4.96 | 3.43e-07 | 2.34e-05 |
| ncbi_114362510 | saccharopine dehydrogenase-like oxidoreductase [Ostrinia furnacalis]               | -1.02 | 2.08e-05 | 6.46e-04 |
| ncbi_114362514 | gag-pol polyprotein precursor [Lasius niger]                                       | -1.20 | 1.99e-05 | 6.25e-04 |
| ncbi_114362551 | PREDICTED: max-binding protein MNT-like [Papilio machaon]                          | -1.32 | 6.63e-04 | 9.25e-03 |
| ncbi_114362572 | O-acyltransferase like protein-like [Ostrinia furnacalis]                          | +3.25 | 3.32e-05 | 9.21e-04 |
| ncbi_114362585 | uncharacterized protein LOC114362585 [Ostrinia furnacalis]                         | -9.42 | 2.05e-03 | 2.18e-02 |
| ncbi_114362605 | UNC93-like protein MFSD11 [Ostrinia furnacalis]                                    | -1.08 | 5.69e-06 | 2.29e-04 |
| ncbi_114362618 | TD and POZ domain-containing protein 4 [Papilio machaon]                           | -1.06 | 3.86e-05 | 1.05e-03 |
| ncbi_114362670 | MADF domain-containing protein, partial [Aphis craccivora]                         | +1.04 | 3.51e-04 | 5.74e-03 |
| ncbi_114362699 | F-box/LRR-repeat protein 20-like [Ostrinia furnacalis]                             | -1.61 | 6.18e-03 | 4.84e-02 |
| ncbi_114362704 | testis-expressed protein 2-like isoform X1 [Ostrinia furnacalis]                   | -1.03 | 3.11e-06 | 1.43e-04 |
| ncbi_114362736 | cuticle protein 1-like [Ostrinia furnacalis]                                       | +9.85 | 4.35e-03 | 3.75e-02 |
| ncbi_114362756 | short-chain dehydrogenase/reductase family 16C member 6-like [Ostrinia furnacalis] | +2.85 | 4.01e-06 | 1.74e-04 |
| ncbi_114362928 | peroxisomal membrane protein 11C-like [Ostrinia furnacalis]                        | +2.12 | 5.12e-05 | 1.31e-03 |
| ncbi_114363007 | organic cation transporter protein-like [Ostrinia furnacalis]                      | +1.17 | 2.09e-06 | 1.02e-04 |
| ncbi_114363023 | ATP-dependent DNA helicase PIF1 [Eumeta japonica]                                  | -1.39 | 4.09e-05 | 1.11e-03 |
| ncbi_114363053 | solute carrier family 25 member 35-like isoform X1 [Ostrinia furnacalis]           | +1.53 | 1.59e-04 | 3.23e-03 |
| ncbi_114363104 | fatty acid-binding protein 1-like [Ostrinia furnacalis]                            | +1.32 | 1.28e-13 | 7.55e-11 |
| ncbi_114363204 | DNA-directed RNA polymerase I subunit RPA43 [Ostrinia furnacalis]                  | -1.04 | 2.45e-03 | 2.49e-02 |
| ncbi_114363286 | proteoglycan 4-like [Ostrinia furnacalis]                                          | -1.90 | 1.99e-15 | 1.30e-12 |
| ncbi_114363287 | P94 protein [Danaus plexippus plexippus]                                           | -1.85 | 1.19e-15 | 8.76e-13 |
| ncbi_114363298 | Fanconi anemia group D2 protein [Ostrinia furnacalis]                              | -1.19 | 7.60e-07 | 4.39e-05 |

|                |                                                                                                  |       |          |          |
|----------------|--------------------------------------------------------------------------------------------------|-------|----------|----------|
| ncbi_114363299 | Apolipoprotein of lipid transfer particle-III [Operophtera brumata]                              | +2.52 | 7.59e-05 | 1.80e-03 |
| ncbi_114363343 | Jerky-like, partial [Aphis craccivora]                                                           | -3.49 | 6.44e-03 | 4.98e-02 |
| ncbi_114363471 | PREDICTED: GATA zinc finger domain-containing protein 14-like [Amyeloidis transitella]           | -1.59 | 3.40e-08 | 3.45e-06 |
| ncbi_114363654 | NHP2-like protein 1 [Ostrinia furnacalis]                                                        | +1.03 | 8.12e-08 | 7.48e-06 |
| ncbi_114363699 | uncharacterized protein LOC114363699 [Ostrinia furnacalis]                                       | +8.96 | 2.45e-03 | 2.49e-02 |
| ncbi_114363709 | adenylate kinase-like [Ostrinia furnacalis]                                                      | +1.61 | 7.49e-10 | 1.24e-07 |
| ncbi_114363715 | beta-hexosaminidase subunit alpha-like isoform X1 [Ostrinia furnacalis]                          | -1.10 | 5.01e-04 | 7.51e-03 |
| ncbi_114363760 | nuclear pore complex protein Nup133 [Hypomocoma kahamanoa]                                       | -1.95 | 1.10e-04 | 2.39e-03 |
| ncbi_114363773 | heat shock protein 68-like [Ostrinia furnacalis]                                                 | -2.90 | 1.37e-03 | 1.61e-02 |
| ncbi_114363785 | myosin-9-like [Ostrinia furnacalis]                                                              | -4.29 | 6.70e-12 | 2.02e-09 |
| ncbi_114363794 | dynein heavy chain 12, axonemal [Ostrinia furnacalis]                                            | -1.37 | 2.43e-03 | 2.47e-02 |
| ncbi_114363798 | mitochondrial import inner membrane translocase subunit Tim29 [Ostrinia furnacalis]              | +1.79 | 2.67e-03 | 2.64e-02 |
| ncbi_114363810 | alanine--glyoxylate aminotransferase 2-like [Ostrinia furnacalis]                                | -1.64 | 1.68e-15 | 1.16e-12 |
| ncbi_114363814 | decaprenyl-diphosphate synthase subunit 1 [Ostrinia furnacalis]                                  | +1.09 | 3.06e-08 | 3.28e-06 |
| ncbi_114363843 | Integrase catalytic domain-containing protein [Aphis craccivora]                                 | +3.09 | 2.53e-05 | 7.57e-04 |
| ncbi_114363884 | peroxidase-like [Ostrinia furnacalis]                                                            | +8.04 | 4.36e-03 | 3.76e-02 |
| ncbi_114363893 | KH domain-containing protein 3-like [Ostrinia furnacalis]                                        | -1.23 | 2.38e-07 | 1.76e-05 |
| ncbi_114363909 | cell cycle checkpoint protein RAD1 isoform X1 [Ostrinia furnacalis]                              | +1.57 | 1.17e-07 | 1.02e-05 |
| ncbi_114363921 | mucin-5AC isoform X2 [Helicoverpa armigera]                                                      | -4.29 | 3.21e-03 | 3.03e-02 |
| ncbi_114363979 | uncharacterized protein LOC114363979 [Ostrinia furnacalis]                                       | -1.20 | 4.84e-03 | 4.02e-02 |
| ncbi_114363995 | Retrovirus-related Pol polyprotein from transposon 17.6 [Operophtera brumata]                    | -4.54 | 7.17e-07 | 4.25e-05 |
| ncbi_114364020 | leucine-rich melanocyte differentiation-associated protein-like isoform X1 [Ostrinia furnacalis] | -1.04 | 3.90e-03 | 3.48e-02 |
| ncbi_114364072 | long-chain-fatty-acid--CoA ligase 4 [Ostrinia furnacalis]                                        | +1.05 | 2.11e-08 | 2.37e-06 |
| ncbi_114364098 | C-type lectin 4 isoform X2 [Bombyx mori]                                                         | +2.05 | 9.51e-06 | 3.48e-04 |
| ncbi_114364123 | transposase, partial [Helicoverpa zea]                                                           | -1.09 | 1.24e-05 | 4.28e-04 |

|                |                                                                                                                |       |          |          |
|----------------|----------------------------------------------------------------------------------------------------------------|-------|----------|----------|
| ncbi_114364179 | glutamate receptor ionotropic, NMDA 2B [Ostrinia furnacalis]                                                   | -3.73 | 2.24e-06 | 1.08e-04 |
| ncbi_114364204 | protein N-lysine methyltransferase FAM173B-like [Ostrinia furnacalis]                                          | +1.12 | 4.39e-03 | 3.76e-02 |
| ncbi_114364316 | uncharacterized protein LOC114364316 [Ostrinia furnacalis]                                                     | +1.76 | 1.17e-03 | 1.43e-02 |
| ncbi_114364367 | vitellogenin receptor protein [Ostrinia furnacalis]                                                            | +3.44 | 6.12e-03 | 4.80e-02 |
| ncbi_114364369 | calcium/calmodulin-dependent 3',5'-cyclic nucleotide phosphodiesterase 1-like isoform X1 [Ostrinia furnacalis] | +1.44 | 3.68e-05 | 1.01e-03 |
| ncbi_114364428 | ATP-dependent DNA helicase PIF1 [Eumeta japonica]                                                              | +2.16 | 6.79e-13 | 2.86e-10 |
| ncbi_114364584 | dual oxidase isoform X1 [Ostrinia furnacalis]                                                                  | -1.91 | 1.05e-03 | 1.32e-02 |
| ncbi_114364591 | NK-tumor recognition protein-like [Bombyx mandarina]                                                           | +2.93 | 2.96e-04 | 5.10e-03 |
| ncbi_114364620 | TRAS3 [Bombyx mori]                                                                                            | +7.93 | 1.88e-03 | 2.03e-02 |
| ncbi_114364654 | indole-3-acetaldehyde oxidase-like isoform X1 [Ostrinia furnacalis]                                            | -1.27 | 6.35e-07 | 3.95e-05 |
| ncbi_114364671 | F-box/LRR-repeat protein 7-like [Ostrinia furnacalis]                                                          | -1.12 | 1.09e-03 | 1.36e-02 |
| ncbi_114364698 | proline-rich protein 36-like, partial [Ostrinia furnacalis]                                                    | -1.12 | 3.37e-03 | 3.14e-02 |
| ncbi_114364789 | Si:dkey-56d12.4 protein [Operophtera brumata]                                                                  | -1.51 | 1.04e-06 | 5.58e-05 |
| ncbi_114364831 | pickpocket protein 28-like [Ostrinia furnacalis]                                                               | -2.24 | 1.44e-04 | 2.99e-03 |
| ncbi_114364876 | probable cytochrome P450 304a1 isoform X1 [Ostrinia furnacalis]                                                | -3.91 | 1.37e-03 | 1.61e-02 |
| ncbi_114365145 | PREDICTED: serine/threonine-protein kinase BRSK2-like [Plutella xylostella]                                    | +1.75 | 1.33e-03 | 1.57e-02 |
| ncbi_114365229 | dynein heavy chain 10, axonemal, partial [Ostrinia furnacalis]                                                 | -2.10 | 1.59e-04 | 3.23e-03 |
| ncbi_114365282 | cytochrome P450 6B5-like [Ostrinia furnacalis]                                                                 | -1.05 | 6.30e-06 | 2.48e-04 |
| ncbi_114365293 | headcase protein [Ostrinia furnacalis]                                                                         | -1.12 | 5.35e-05 | 1.36e-03 |
| ncbi_114365341 | glutathione S-transferase-like [Ostrinia furnacalis]                                                           | -1.33 | 1.55e-06 | 7.81e-05 |
| ncbi_114365479 | odorant receptor [Ostrinia scapulalis]                                                                         | -4.89 | 1.17e-05 | 4.13e-04 |
| ncbi_114365487 | olfactory receptor 3 [Ostrinia furnacalis]                                                                     | -5.20 | 1.06e-03 | 1.33e-02 |
| ncbi_114365542 | flocculation protein FLO11-like [Manduca sexta]                                                                | +8.34 | 9.08e-04 | 1.18e-02 |
| ncbi_114365545 | aldo-keto reductase AKR2E4-like [Ostrinia furnacalis]                                                          | +9.01 | 4.92e-04 | 7.41e-03 |

|                |                                                                                        |       |          |          |
|----------------|----------------------------------------------------------------------------------------|-------|----------|----------|
| ncbi_114365566 | fasciclin-2-like [Ostrinia furnacalis]                                                 | +3.42 | 4.92e-03 | 4.08e-02 |
| ncbi_114365584 | arf-GAP with dual PH domain-containing protein 1-like isoform X1 [Ostrinia furnacalis] | -1.14 | 5.68e-03 | 4.55e-02 |
| ncbi_114365595 | nitric oxide synthase-like protein [Ostrinia furnacalis]                               | +1.84 | 2.75e-06 | 1.28e-04 |
| ncbi_114365597 | cysteine synthase-like [Ostrinia furnacalis]                                           | -1.31 | 1.19e-12 | 4.53e-10 |
| ncbi_114365688 | AGAP004199-PA [Anopheles gambiae str. PEST] [Anopheles gambiae]                        | +1.65 | 3.38e-07 | 2.32e-05 |
| ncbi_114365702 | chymotrypsin-1-like [Ostrinia furnacalis]                                              | +1.43 | 7.12e-04 | 9.80e-03 |
| ncbi_114365747 | uncharacterized protein LOC114365747 [Ostrinia furnacalis]                             | -1.12 | 7.38e-05 | 1.76e-03 |
| ncbi_114365751 | pancreatic triacylglycerol lipase-like [Ostrinia furnacalis]                           | +2.06 | 1.91e-03 | 2.07e-02 |
| ncbi_114365762 | microvitellogenin-like [Ostrinia furnacalis]                                           | +1.10 | 1.49e-03 | 1.72e-02 |
| ncbi_114365835 | biogenesis of lysosome-related organelles complex 1 subunit 3-like [Bombyx mandarina]  | -2.08 | 9.60e-05 | 2.15e-03 |
| ncbi_114365850 | mpv17-like protein isoform X1 [Ostrinia furnacalis]                                    | +1.08 | 1.81e-07 | 1.45e-05 |
| ncbi_114365912 | uncharacterized protein LOC114365912 [Ostrinia furnacalis]                             | +5.75 | 2.03e-89 | 2.39e-85 |
| ncbi_114365951 | PREDICTED: protein Dok-7-like [Papilio machaon]                                        | -4.67 | 5.31e-03 | 4.34e-02 |
| ncbi_114366046 | BRCA1-associated ATM activator 1 [Operophtera brumata]                                 | -1.11 | 9.28e-07 | 5.13e-05 |
| ncbi_114366053 | PREDICTED: protein unc-13 homolog C-like [Amyelois transitella]                        | -2.69 | 1.30e-03 | 1.54e-02 |
| ncbi_114366060 | protein scarlet isoform X1 [Ostrinia furnacalis]                                       | -1.10 | 1.38e-03 | 1.62e-02 |
| ncbi_114366090 | fructose-bisphosphate aldolase-like [Ostrinia furnacalis]                              | -1.08 | 5.67e-03 | 4.54e-02 |
| ncbi_114366114 | organic cation transporter protein-like [Ostrinia furnacalis]                          | +2.29 | 1.82e-05 | 5.83e-04 |
| ncbi_114366120 | lysosomal thioesterase PPT2 homolog [Ostrinia furnacalis]                              | -1.35 | 1.03e-03 | 1.31e-02 |
| ncbi_114366128 | glutamic acid-rich protein-like [Ostrinia furnacalis]                                  | +1.15 | 7.89e-04 | 1.06e-02 |
| ncbi_114366173 | fat-like cadherin-related tumor suppressor homolog [Spodoptera litura]                 | -1.80 | 7.02e-05 | 1.71e-03 |
| ncbi_114366235 | clavesin-2-like isoform X2 [Ostrinia furnacalis]                                       | -1.24 | 1.31e-04 | 2.76e-03 |
| ncbi_114366244 | probable chitinase 2 [Ostrinia furnacalis]                                             | +1.01 | 1.19e-07 | 1.02e-05 |
| ncbi_114366246 | probable chitinase 2 [Ostrinia furnacalis]                                             | +1.85 | 4.54e-08 | 4.31e-06 |
| ncbi_114366292 | prostaglandin reductase 1-like isoform X1 [Ostrinia furnacalis]                        | +1.12 | 3.38e-08 | 3.45e-06 |



|                            |                                                                                                |        |          |          |
|----------------------------|------------------------------------------------------------------------------------------------|--------|----------|----------|
| ncbi_114366345             | tenascin-like isoform X6 [ <i>Pieris rapae</i> ]                                               | -1.04  | 1.97e-05 | 6.24e-04 |
| ncbi_114366431             | C-type lectin 5 precursor [ <i>Bombyx mori</i> ]                                               | +1.89  | 5.83e-06 | 2.33e-04 |
| ncbi_114366439             | Ecdysteroid 22-kinase [ <i>Operophtera brumata</i> ]                                           | -1.47  | 3.03e-07 | 2.13e-05 |
| ncbi_114366442             | Protein Flattop homolog [ <i>Eumeta japonica</i> ]                                             | +1.32  | 4.02e-11 | 9.47e-09 |
| ncbi_114366470             | facilitated trehalose transporter Tret1-like [ <i>Ostrinia furnacalis</i> ]                    | -2.06  | 1.75e-03 | 1.93e-02 |
| ncbi_114366503             | cytochrome P450 302a1, mitochondrial [ <i>Ostrinia furnacalis</i> ]                            | -1.62  | 9.25e-05 | 2.11e-03 |
| ncbi_114366552             | pupal cuticle protein 36-like [ <i>Ostrinia furnacalis</i> ]                                   | -5.81  | 6.31e-05 | 1.58e-03 |
| ncbi_114366654             | AGAP001610-PA-like protein [ <i>Anopheles sinensis</i> ]                                       | +2.76  | 7.12e-07 | 4.24e-05 |
| ncbi_114366669             | UDP-glucuronosyltransferase 2B2-like [ <i>Ostrinia furnacalis</i> ]                            | +1.30  | 6.26e-06 | 2.47e-04 |
| ncbi_114366672             | beta-1,3-glucan-binding protein-like isoform X1 [ <i>Ostrinia furnacalis</i> ]                 | -2.53  | 5.05e-09 | 6.84e-07 |
| ncbi_114366687             | BCL2/adenovirus E1B 19 kDa protein-interacting protein 3 [ <i>Ostrinia furnacalis</i> ]        | -1.10  | 8.58e-04 | 1.12e-02 |
| ncbi_114366714             | GTP-binding protein SAR1b [ <i>Ostrinia furnacalis</i> ]                                       | +1.02  | 8.54e-06 | 3.23e-04 |
| ncbi_114366745             | transferrin [ <i>Ostrinia furnacalis</i> ]                                                     | -1.45  | 9.01e-04 | 1.17e-02 |
| <b>ACB-BtS vs. ACB-IeR</b> |                                                                                                |        |          |          |
| MSTRG.11721                | polyprotein [ <i>Operophtera brumata</i> ]                                                     | +2.51  | 8.28e-06 | 3.89e-04 |
| MSTRG.12072                | -                                                                                              | -1.32  | 5.45e-04 | 1.12e-02 |
| MSTRG.12593                | polyprotein [ <i>Antheraea mylitta</i> ]                                                       | +10.02 | 3.16e-04 | 7.36e-03 |
| MSTRG.12887                | -                                                                                              | -1.19  | 2.93e-03 | 3.94e-02 |
| MSTRG.13629                | mitogen-activated protein kinase kinase kinase 5-like, partial [ <i>Manduca sexta</i> ]        | -2.11  | 3.62e-03 | 4.57e-02 |
| MSTRG.13644                | -                                                                                              | -1.28  | 2.41e-03 | 3.45e-02 |
| MSTRG.13843                | gag-pol polyprotein [ <i>Lasius niger</i> ]                                                    | +3.64  | 6.63e-12 | 1.62e-09 |
| MSTRG.14142                | UDP-glucuronosyltransferase 2B15-like [ <i>Ostrinia furnacalis</i> ]                           | +1.44  | 9.59e-07 | 6.34e-05 |
| MSTRG.14273                | -                                                                                              | +1.58  | 1.31e-03 | 2.22e-02 |
| MSTRG.14336                | Tyrosine-protein kinase BAZ1B [ <i>Folsomia candida</i> ]                                      | +4.14  | 9.92e-04 | 1.81e-02 |
| MSTRG.14366                | PREDICTED: nuclear transcription factor Y subunit gamma-like [ <i>Amyeloidis transitella</i> ] | +2.03  | 8.11e-10 | 1.21e-07 |

|             |                                                                               |       |          |          |
|-------------|-------------------------------------------------------------------------------|-------|----------|----------|
| MSTRG.1441  | -                                                                             | -1.98 | 2.39e-13 | 7.45e-11 |
| MSTRG.14629 | -                                                                             | -1.39 | 6.29e-05 | 2.08e-03 |
| MSTRG.14691 | -                                                                             | +1.80 | 2.53e-06 | 1.45e-04 |
| MSTRG.14718 | Retrovirus-related Pol polyprotein from transposon TNT 1-94 [Eumeta japonica] | -1.07 | 8.07e-04 | 1.54e-02 |
| MSTRG.14792 | carboxylesterase, partial [Ostrinia furnacalis]                               | -1.12 | 1.59e-04 | 4.28e-03 |
| MSTRG.15192 | -                                                                             | -1.15 | 1.99e-06 | 1.18e-04 |
| MSTRG.15302 | Histone-lysine N-methyltransferase SETMAR [Eumeta japonica]                   | +3.81 | 3.47e-04 | 7.97e-03 |
| MSTRG.15495 | Transposable element P transposase-like Protein [Tribolium castaneum]         | -1.23 | 4.61e-04 | 9.99e-03 |
| MSTRG.15983 | -                                                                             | -2.63 | 2.03e-03 | 3.06e-02 |
| MSTRG.16057 | Copia protein, partial [Trachymyrmex cornetzi]                                | -1.64 | 1.43e-03 | 2.38e-02 |
| MSTRG.17496 | -                                                                             | -3.16 | 3.24e-03 | 4.26e-02 |
| MSTRG.18395 | -                                                                             | +2.07 | 4.12e-05 | 1.47e-03 |
| MSTRG.1876  | -                                                                             | +1.32 | 5.08e-04 | 1.07e-02 |
| MSTRG.18901 | -                                                                             | -1.48 | 1.87e-03 | 2.92e-02 |
| MSTRG.19620 | -                                                                             | -1.28 | 1.96e-03 | 3.00e-02 |
| MSTRG.19800 | -                                                                             | +2.79 | 2.62e-07 | 2.07e-05 |
| MSTRG.1988  | Histone-lysine N-methyltransferase SETMAR [Eumeta japonica]                   | +4.25 | 1.46e-04 | 3.94e-03 |
| MSTRG.19983 | Transposable element P transposase [Papilio xuthus]                           | -1.56 | 2.87e-15 | 1.22e-12 |
| MSTRG.20185 | -                                                                             | -1.20 | 1.15e-04 | 3.28e-03 |
| MSTRG.20799 | reverse transcriptase and recombinase [Glyptapanteles indiensis]              | -1.01 | 4.61e-05 | 1.60e-03 |
| MSTRG.20845 | uncharacterized protein LOC114356336 [Ostrinia furnacalis]                    | -1.27 | 7.73e-07 | 5.36e-05 |
| MSTRG.2091  | Integrase catalytic domain-containing protein, partial [Aphis craccivora]     | -1.48 | 2.90e-03 | 3.92e-02 |
| MSTRG.21492 | -                                                                             | -2.71 | 2.10e-03 | 3.15e-02 |
| MSTRG.21877 | -                                                                             | -1.58 | 3.92e-05 | 1.41e-03 |
| MSTRG.21972 | -                                                                             | -1.14 | 4.13e-07 | 3.06e-05 |

|             |                                                                                                       |        |          |          |
|-------------|-------------------------------------------------------------------------------------------------------|--------|----------|----------|
| MSTRG.21975 | Probable RNA-directed DNA polymerase from transposon BS [ <i>Eumeta japonica</i> ]                    | -1.09  | 2.18e-06 | 1.27e-04 |
| MSTRG.22088 | PREDICTED: RNA-directed DNA polymerase from mobile element jockey-like [ <i>Acropora digitifera</i> ] | -3.75  | 2.62e-03 | 3.64e-02 |
| MSTRG.22193 | uncharacterized protein LOC114363438 [ <i>Ostrinia furnacalis</i> ]                                   | +1.08  | 2.47e-04 | 6.13e-03 |
| MSTRG.22677 | Retrovirus-related Pol polyprotein from transposon 297 [ <i>Araneus ventricosus</i> ]                 | -2.97  | 5.10e-05 | 1.76e-03 |
| MSTRG.22788 | ORF1p [ <i>Operophtera brumata</i> ]                                                                  | -1.23  | 1.38e-09 | 1.94e-07 |
| MSTRG.22839 | PREDICTED: uncharacterized protein LOC106137436 [ <i>Amyeloides transitella</i> ]                     | -1.50  | 1.54e-03 | 2.52e-02 |
| MSTRG.23064 | -                                                                                                     | -1.42  | 4.28e-06 | 2.27e-04 |
| MSTRG.23526 | retinol dehydrogenase 14-like [ <i>Vanessa tameamea</i> ]                                             | -1.00  | 2.99e-04 | 7.05e-03 |
| MSTRG.2455  | -                                                                                                     | -6.72  | 1.38e-05 | 6.01e-04 |
| MSTRG.2456  | piggyBac transposable element-derived protein 2-like [ <i>Bicyclus anynana</i> ]                      | -4.09  | 4.29e-04 | 9.47e-03 |
| MSTRG.2477  | -                                                                                                     | -1.89  | 9.56e-04 | 1.75e-02 |
| MSTRG.24877 | Yokozuna [ <i>Bombyx mori</i> ]                                                                       | -1.03  | 1.52e-06 | 9.30e-05 |
| MSTRG.25018 | -                                                                                                     | +1.98  | 1.99e-04 | 5.12e-03 |
| MSTRG.25147 | CLIP-associating protein-like [ <i>Ostrinia furnacalis</i> ]                                          | +10.57 | 1.06e-05 | 4.78e-04 |
| MSTRG.2537  | Retrovirus-related Pol polyprotein from transposon TNT 1-94 [ <i>Eumeta japonica</i> ]                | -2.38  | 1.87e-05 | 7.57e-04 |
| MSTRG.25513 | -                                                                                                     | -1.13  | 1.89e-15 | 8.36e-13 |
| MSTRG.25630 | uncharacterized protein LOC114350796 [ <i>Ostrinia furnacalis</i> ]                                   | +3.74  | 4.92e-08 | 4.93e-06 |
| MSTRG.25758 | -                                                                                                     | -1.75  | 1.66e-05 | 6.86e-04 |
| MSTRG.25915 | -                                                                                                     | -1.12  | 3.47e-03 | 4.43e-02 |
| MSTRG.25972 | gag-pol polyprotein [ <i>Lasius niger</i> ]                                                           | +1.91  | 8.72e-04 | 1.63e-02 |
| MSTRG.26114 | reverse transcriptase [ <i>Ostrinia nubilalis</i> ]                                                   | +1.25  | 2.44e-07 | 1.95e-05 |
| MSTRG.2643  | Maltase A1 [ <i>Eumeta japonica</i> ]                                                                 | -1.09  | 4.55e-06 | 2.37e-04 |
| MSTRG.2646  | hypothetical protein evm_006816 [ <i>Chilo suppressalis</i> ]                                         | -1.82  | 3.57e-11 | 7.61e-09 |
| MSTRG.2994  | reverse transcriptase [ <i>Anguilla japonica</i> ]                                                    | +1.82  | 7.08e-08 | 6.57e-06 |
| MSTRG.3110  | reverse transcriptase [ <i>Ostrinia nubilalis</i> ]                                                   | +1.45  | 5.79e-13 | 1.71e-10 |

|                |                                                                                             |        |          |          |
|----------------|---------------------------------------------------------------------------------------------|--------|----------|----------|
| MSTRG.3528     | Activity-regulated cytoskeleton associated protein 2 [Eumeta japonica]                      | -1.52  | 2.53e-17 | 1.45e-14 |
| MSTRG.3530     | activity-regulated cytoskeleton associated protein 1-like [Ostrinia furnacalis]             | -3.74  | 9.90e-05 | 2.91e-03 |
| MSTRG.3877     | -                                                                                           | -1.27  | 9.99e-07 | 6.53e-05 |
| MSTRG.4352     | -                                                                                           | +5.02  | 4.49e-04 | 9.82e-03 |
| MSTRG.4353     | -                                                                                           | -1.57  | 3.16e-06 | 1.76e-04 |
| MSTRG.4559     | chymotrypsin-like serine protease [Ostrinia nubilalis]                                      | +1.31  | 3.67e-13 | 1.11e-10 |
| MSTRG.4713     | -                                                                                           | -1.08  | 3.61e-03 | 4.56e-02 |
| MSTRG.4860     | src substrate cortactin [Spodoptera litura]                                                 | -2.15  | 2.19e-10 | 3.70e-08 |
| MSTRG.5947     | N-terminal kinase-like protein [Manduca sexta]                                              | -1.15  | 7.96e-07 | 5.49e-05 |
| MSTRG.6385     | -                                                                                           | +2.70  | 3.85e-10 | 6.33e-08 |
| MSTRG.6440     | hypothetical protein B5X24_HaOG210684 [Helicoverpa armigera]                                | -1.59  | 2.94e-07 | 2.26e-05 |
| MSTRG.6632     | gag-pol protein, partial [Lasius niger]                                                     | -1.90  | 3.32e-04 | 7.67e-03 |
| MSTRG.6933     | -                                                                                           | -3.85  | 4.54e-04 | 9.87e-03 |
| MSTRG.8144     | -                                                                                           | +11.05 | 6.36e-04 | 1.27e-02 |
| MSTRG.8195     | pol polyprotein [Lasius niger]                                                              | -1.50  | 8.39e-05 | 2.57e-03 |
| MSTRG.840      | Gag-pol polyprotein, partial [Operophtera brumata]                                          | -1.37  | 1.03e-05 | 4.69e-04 |
| MSTRG.9141     | THAP domain-containing protein 2-like [Ostrinia furnacalis]                                 | -2.26  | 1.88e-03 | 2.92e-02 |
| MSTRG.9261     | -                                                                                           | -2.06  | 2.69e-03 | 3.71e-02 |
| ncbi_114349549 | probable glycerol-3-phosphate dehydrogenase, mitochondrial isoform X1 [Ostrinia furnacalis] | +1.97  | 1.30e-06 | 8.38e-05 |
| ncbi_114349592 | phospholipase A1 member A-like [Ostrinia furnacalis]                                        | +1.42  | 9.99e-07 | 6.53e-05 |
| ncbi_114349600 | lipoprotein lipase-like [Ostrinia furnacalis]                                               | +1.09  | 5.60e-08 | 5.46e-06 |
| ncbi_114349603 | pancreatic lipase-related protein 2-like [Ostrinia furnacalis]                              | +2.79  | 1.23e-09 | 1.79e-07 |
| ncbi_114349618 | uncharacterized protein LOC114349618 [Ostrinia furnacalis]                                  | +5.38  | 3.35e-06 | 1.85e-04 |
| ncbi_114349629 | pancreatic triacylglycerol lipase-like [Ostrinia furnacalis]                                | +3.98  | 9.20e-14 | 3.11e-11 |
| ncbi_114349639 | pancreatic triacylglycerol lipase-like [Ostrinia furnacalis]                                | -1.43  | 1.50e-07 | 1.29e-05 |

|                |                                                                                               |       |          |          |
|----------------|-----------------------------------------------------------------------------------------------|-------|----------|----------|
| ncbi_114349648 | AAEL013537-PB [ <i>Aedes aegypti</i> ]                                                        | +2.32 | 2.02e-03 | 3.05e-02 |
| ncbi_114349651 | cyclic nucleotide-gated cation channel beta-3 isoform X1 [ <i>Ostrinia furnacalis</i> ]       | +1.42 | 3.59e-03 | 4.54e-02 |
| ncbi_114349707 | Kynurenine formamidase [ <i>Danaus plexippus plexippus</i> ]                                  | -2.68 | 4.29e-10 | 6.77e-08 |
| ncbi_114349797 | dynein heavy chain 8, axonemal [ <i>Ostrinia furnacalis</i> ]                                 | +4.25 | 4.28e-04 | 9.47e-03 |
| ncbi_114349834 | DNA helicase MCM8 isoform X1 [ <i>Ostrinia furnacalis</i> ]                                   | +1.70 | 1.67e-04 | 4.46e-03 |
| ncbi_114349846 | agrin-like [ <i>Ostrinia furnacalis</i> ]                                                     | +2.10 | 4.45e-04 | 9.77e-03 |
| ncbi_114349898 | THAP-type domain-containing protein, partial [ <i>Aphis craccivora</i> ]                      | -1.09 | 1.63e-03 | 2.63e-02 |
| ncbi_114349957 | Ring canal kelch-like [ <i>Papilio xuthus</i> ]                                               | -1.75 | 1.26e-09 | 1.82e-07 |
| ncbi_114350040 | leucine-rich repeats and immunoglobulin-like domains protein 2 [ <i>Ostrinia furnacalis</i> ] | +4.19 | 2.77e-07 | 2.15e-05 |
| ncbi_114350090 | transmembrane protease serine 3-like [ <i>Ostrinia furnacalis</i> ]                           | +1.40 | 5.34e-25 | 6.15e-22 |
| ncbi_114350216 | kynureninase [ <i>Bombyx mori</i> ]                                                           | -1.11 | 5.66e-04 | 1.16e-02 |
| ncbi_114350246 | tyramine beta-hydroxylase isoform X1 [ <i>Ostrinia furnacalis</i> ]                           | -3.40 | 3.14e-03 | 4.17e-02 |
| ncbi_114350359 | titin-like [ <i>Ostrinia furnacalis</i> ]                                                     | +2.38 | 5.11e-04 | 1.08e-02 |
| ncbi_114350361 | CLUMA_CG007896, isoform C [ <i>Clunio marinus</i> ]                                           | -1.06 | 9.51e-05 | 2.82e-03 |
| ncbi_114350447 | cuticle collagen 1-like [ <i>Ostrinia furnacalis</i> ]                                        | +4.16 | 4.17e-07 | 3.07e-05 |
| ncbi_114350537 | Endonuclease-reverse transcriptase [ <i>Operophtera brumata</i> ]                             | -2.08 | 9.74e-17 | 4.67e-14 |
| ncbi_114350635 | tetraspanin-33-like [ <i>Ostrinia furnacalis</i> ]                                            | -1.31 | 4.76e-04 | 1.02e-02 |
| ncbi_114350648 | probable maleylacetoacetate isomerase 1 [ <i>Ostrinia furnacalis</i> ]                        | -1.84 | 3.97e-03 | 4.88e-02 |
| ncbi_114350651 | uncharacterized protein LOC114350651 [ <i>Ostrinia furnacalis</i> ]                           | -1.21 | 3.01e-05 | 1.14e-03 |
| ncbi_114350692 | THAP domain-containing protein 2-like isoform X1 [ <i>Ostrinia furnacalis</i> ]               | -1.12 | 3.30e-03 | 4.30e-02 |
| ncbi_114350784 | THAP domain-containing protein 2 [ <i>Eumeta japonica</i> ]                                   | -1.73 | 2.91e-04 | 6.90e-03 |
| ncbi_114350785 | fatty acyl-CoA reductase wat-like isoform X1 [ <i>Ostrinia furnacalis</i> ]                   | -3.18 | 6.00e-04 | 1.22e-02 |
| ncbi_114350848 | 5'-AMP-activated protein kinase catalytic subunit alpha-2-like [ <i>Ostrinia furnacalis</i> ] | -1.15 | 3.98e-07 | 2.98e-05 |
| ncbi_114350993 | Integrase catalytic domain-containing protein, partial [ <i>Aphis craccivora</i> ]            | -1.30 | 1.84e-07 | 1.53e-05 |
| ncbi_114351005 | senecionine N-oxygenase isoform X1 [ <i>Ostrinia furnacalis</i> ]                             | -3.57 | 3.51e-05 | 1.29e-03 |

|                |                                                                                    |       |          |          |
|----------------|------------------------------------------------------------------------------------|-------|----------|----------|
| ncbi_114351044 | gag-pol polyprotein precursor [ <i>Lasius niger</i> ]                              | -1.35 | 1.04e-03 | 1.87e-02 |
| ncbi_114351145 | Integrase catalytic domain-containing protein, partial [ <i>Aphis craccivora</i> ] | +1.14 | 7.48e-05 | 2.36e-03 |
| ncbi_114351183 | multidrug resistance protein 1A isoform X1 [ <i>Ostrinia furnacalis</i> ]          | -1.92 | 5.17e-22 | 4.25e-19 |
| ncbi_114351190 | prostaglandin reductase 1-like [ <i>Ostrinia furnacalis</i> ]                      | -1.29 | 2.48e-16 | 1.14e-13 |
| ncbi_114351223 | alpha-tocopherol transfer protein-like [ <i>Ostrinia furnacalis</i> ]              | -1.68 | 9.69e-11 | 1.83e-08 |
| ncbi_114351224 | alpha-tocopherol transfer protein-like [ <i>Ostrinia furnacalis</i> ]              | -1.10 | 9.94e-04 | 1.81e-02 |
| ncbi_114351296 | J protein JJJ1-like isoform X1 [ <i>Danaus plexippus plexippus</i> ]               | -1.02 | 2.07e-05 | 8.27e-04 |
| ncbi_114351422 | sodium-dependent phosphate transporter [ <i>Danaus plexippus plexippus</i> ]       | -1.19 | 7.14e-07 | 5.04e-05 |
| ncbi_114351480 | cytochrome b5-related protein-like [ <i>Ostrinia furnacalis</i> ]                  | -3.15 | 2.81e-03 | 3.82e-02 |
| ncbi_114351538 | proteasome assembly chaperone 2 [ <i>Ostrinia furnacalis</i> ]                     | -1.07 | 1.91e-04 | 4.96e-03 |
| ncbi_114351551 | lymphocyte expansion molecule-like [ <i>Galleria mellonella</i> ]                  | +3.99 | 4.71e-06 | 2.43e-04 |
| ncbi_114351572 | Zinc finger DNA binding protein [ <i>Operophtera brumata</i> ]                     | -3.75 | 8.75e-12 | 2.05e-09 |
| ncbi_114351648 | AAEL012860-PA [ <i>Aedes aegypti</i> ]                                             | +1.28 | 7.23e-05 | 2.30e-03 |
| ncbi_114351683 | Apolipophorin [ <i>Papilio xuthus</i> ]                                            | -1.72 | 6.44e-04 | 1.28e-02 |
| ncbi_114351809 | pancreatic triacylglycerol lipase-like [ <i>Ostrinia furnacalis</i> ]              | +1.07 | 2.21e-08 | 2.51e-06 |
| ncbi_114351842 | cyclin-J-like [ <i>Ostrinia furnacalis</i> ]                                       | -1.19 | 1.61e-09 | 2.23e-07 |
| ncbi_114351909 | alpha-tocopherol transfer protein-like, partial [ <i>Ostrinia furnacalis</i> ]     | +1.32 | 1.21e-03 | 2.09e-02 |
| ncbi_114351915 | transmembrane protease serine 9-like [ <i>Ostrinia furnacalis</i> ]                | +3.17 | 7.36e-05 | 2.33e-03 |
| ncbi_114351935 | trypsin, alkaline C-like [ <i>Ostrinia furnacalis</i> ]                            | +2.08 | 2.11e-23 | 2.03e-20 |
| ncbi_114351936 | trypsin, alkaline C-like isoform X1 [ <i>Ostrinia furnacalis</i> ]                 | +2.95 | 5.85e-11 | 1.20e-08 |
| ncbi_114351939 | trypsin, alkaline C-like [ <i>Ostrinia furnacalis</i> ]                            | +1.79 | 1.14e-04 | 3.27e-03 |
| ncbi_114351942 | trypsin, alkaline B-like [ <i>Ostrinia furnacalis</i> ]                            | +3.34 | 2.06e-12 | 5.79e-10 |
| ncbi_114351970 | mucin-5AC-like [ <i>Ostrinia furnacalis</i> ]                                      | -6.08 | 9.52e-07 | 6.34e-05 |
| ncbi_114352033 | CD109 antigen-like [ <i>Ostrinia furnacalis</i> ]                                  | +1.60 | 7.43e-08 | 6.80e-06 |
| ncbi_114352048 | exonuclease mut-7 homolog [ <i>Ostrinia furnacalis</i> ]                           | -1.12 | 1.78e-03 | 2.82e-02 |

|                |                                                                                                     |       |          |          |
|----------------|-----------------------------------------------------------------------------------------------------|-------|----------|----------|
| ncbi_114352104 | lipase 1-like [Ostrinia furnacalis]                                                                 | +1.47 | 1.12e-06 | 7.30e-05 |
| ncbi_114352113 | peptidoglycan-recognition protein LB-like [Ostrinia furnacalis]                                     | -1.20 | 4.00e-09 | 5.23e-07 |
| ncbi_114352176 | myosin-binding protein H-like [Bombyx mandarina]                                                    | -1.18 | 1.38e-06 | 8.78e-05 |
| ncbi_114352259 | trypsin, alkaline B-like [Ostrinia furnacalis]                                                      | -1.33 | 4.62e-09 | 5.98e-07 |
| ncbi_114352314 | tigger transposable element-derived protein 6-like isoform X1 [Manduca sexta]                       | -5.43 | 4.58e-17 | 2.51e-14 |
| ncbi_114352437 | E3 ubiquitin-protein ligase znrf2-like [Ostrinia furnacalis]                                        | +1.17 | 1.71e-06 | 1.03e-04 |
| ncbi_114352487 | collagenase-like [Ostrinia furnacalis]                                                              | +2.41 | 7.09e-41 | 1.63e-37 |
| ncbi_114352537 | malate dehydrogenase, mitochondrial-like [Ostrinia furnacalis]                                      | -1.35 | 1.94e-06 | 1.17e-04 |
| ncbi_114352594 | protein snakeskin-like [Diabrotica virgifera virgifera]                                             | +1.10 | 3.67e-08 | 3.95e-06 |
| ncbi_114352603 | Endonuclease-reverse transcriptase [Operophtera brumata]                                            | -1.55 | 1.98e-03 | 3.00e-02 |
| ncbi_114352700 | pickpocket protein 28-like isoform X1 [Aphis craccivora]                                            | -9.59 | 6.51e-08 | 6.19e-06 |
| ncbi_114352740 | SMC domain protein [Heliothis subflexa]                                                             | -2.26 | 3.07e-03 | 4.09e-02 |
| ncbi_114352840 | Pro-Pol polyprotein [Folsomia candida]                                                              | -1.54 | 7.15e-05 | 2.29e-03 |
| ncbi_114352903 | L-lactate dehydrogenase B chain-like [Ostrinia furnacalis]                                          | -5.82 | 2.25e-04 | 5.69e-03 |
| ncbi_114353077 | cytochrome P450 9e2-like [Ostrinia furnacalis]                                                      | -2.33 | 7.27e-15 | 2.99e-12 |
| ncbi_114353127 | proton-coupled amino acid transporter-like protein pathetic isoform X1 [Ostrinia furnacalis]        | -1.09 | 1.08e-07 | 9.67e-06 |
| ncbi_114353130 | probable multidrug resistance-associated protein lethal(2)03659 [Ostrinia furnacalis]               | -1.12 | 2.47e-05 | 9.62e-04 |
| ncbi_114353264 | PREDICTED: RNA-directed DNA polymerase from mobile element jockey-like isoform X1 [Papilio machaon] | -2.17 | 2.68e-03 | 3.70e-02 |
| ncbi_114353293 | uncharacterized protein LOC114353293 [Ostrinia furnacalis]                                          | -1.79 | 3.42e-05 | 1.27e-03 |
| ncbi_114353333 | midgut protein Lsti99 [Loxostege sticticalis]                                                       | -1.08 | 3.10e-14 | 1.15e-11 |
| ncbi_114353390 | synaptic vesicle glycoprotein 2C-like isoform X1 [Ostrinia furnacalis]                              | -1.69 | 2.74e-03 | 3.75e-02 |
| ncbi_114353413 | synaptic vesicle 2-related protein-like [Ostrinia furnacalis]                                       | -1.59 | 1.93e-10 | 3.36e-08 |
| ncbi_114353440 | ommochrome-binding protein-like [Helicoverpa armigera]                                              | -4.10 | 1.38e-05 | 6.01e-04 |
| ncbi_114353478 | mucin-5AC-like [Ostrinia furnacalis]                                                                | +6.64 | 1.74e-94 | 9.99e-91 |

|                |                                                                            |       |          |          |
|----------------|----------------------------------------------------------------------------|-------|----------|----------|
| ncbi_114353519 | GPN-loop GTPase 1 [Ostrinia furnacalis]                                    | -1.30 | 1.13e-03 | 1.99e-02 |
| ncbi_114353634 | brachyurin-like [Ostrinia furnacalis]                                      | -1.19 | 4.17e-10 | 6.66e-08 |
| ncbi_114353646 | testis-expressed protein 10-like [Ostrinia furnacalis]                     | -1.55 | 9.53e-04 | 1.74e-02 |
| ncbi_114353648 | protein DPCD [Ostrinia furnacalis]                                         | -1.48 | 1.37e-03 | 2.31e-02 |
| ncbi_114353649 | nucleolar protein 16 [Ostrinia furnacalis]                                 | -1.19 | 3.65e-03 | 4.60e-02 |
| ncbi_114353653 | protein maternal effect lethal 26-like [Ostrinia furnacalis]               | -1.19 | 2.84e-05 | 1.09e-03 |
| ncbi_114353674 | pancreatic lipase-related protein 2-like [Ostrinia furnacalis]             | -3.04 | 6.33e-05 | 2.09e-03 |
| ncbi_114353709 | organic cation transporter protein-like [Ostrinia furnacalis]              | -1.57 | 5.92e-10 | 9.09e-08 |
| ncbi_114353728 | reverse transcriptase [Operophtera brumata]                                | -2.75 | 1.51e-03 | 2.47e-02 |
| ncbi_114353731 | armadillo repeat-containing protein 6 homolog [Ostrinia furnacalis]        | -1.01 | 1.36e-05 | 5.96e-04 |
| ncbi_114353788 | multidrug resistance protein 1A-like [Ostrinia furnacalis]                 | -3.34 | 4.50e-04 | 9.82e-03 |
| ncbi_114353859 | phenoloxidase-activating factor 2-like [Ostrinia furnacalis]               | +3.77 | 5.05e-09 | 6.45e-07 |
| ncbi_114354003 | DNA polymerase nu-like isoform X1 [Ostrinia furnacalis]                    | -1.08 | 4.03e-03 | 4.92e-02 |
| ncbi_114354118 | leucine-rich repeat LGI family member 3-like [Ostrinia furnacalis]         | +5.25 | 2.85e-08 | 3.15e-06 |
| ncbi_114354181 | tyrosine-protein kinase transmembrane receptor Ror [Ostrinia furnacalis]   | -1.11 | 3.39e-03 | 4.38e-02 |
| ncbi_114354340 | programmed cell death protein 2 isoform X1 [Ostrinia furnacalis]           | -1.36 | 1.19e-04 | 3.37e-03 |
| ncbi_114354373 | fatty acid synthase-like [Ostrinia furnacalis]                             | -1.34 | 8.48e-04 | 1.60e-02 |
| ncbi_114354442 | acetylcholine receptor subunit alpha-like [Ostrinia furnacalis]            | +4.41 | 9.39e-06 | 4.30e-04 |
| ncbi_114354482 | integrator complex subunit 10 [Ostrinia furnacalis]                        | -1.12 | 3.52e-04 | 8.06e-03 |
| ncbi_114354525 | 5'-AMP-activated protein kinase subunit gamma-2-like [Ostrinia furnacalis] | -1.04 | 8.09e-05 | 2.49e-03 |
| ncbi_114354545 | Reverse transcriptase and recombinase [Operophtera brumata]                | -3.16 | 1.51e-05 | 6.37e-04 |
| ncbi_114354906 | chymotrypsin-1-like [Ostrinia furnacalis]                                  | +1.08 | 3.58e-25 | 4.58e-22 |
| ncbi_114354911 | cytochrome c oxidase subunit 6C-like [Ostrinia furnacalis]                 | +1.12 | 3.50e-07 | 2.65e-05 |
| ncbi_114355012 | endoplasmin [Ostrinia furnacalis]                                          | +1.08 | 1.92e-19 | 1.16e-16 |
| ncbi_114355021 | ribosome maturation protein SBDS [Ostrinia furnacalis]                     | -1.00 | 1.90e-04 | 4.94e-03 |



|                |                                                                                               |       |          |          |
|----------------|-----------------------------------------------------------------------------------------------|-------|----------|----------|
| ncbi_114355026 | glucose dehydrogenase [FAD, quinone]-like isoform X1 [Ostrinia furnacalis]                    | -1.16 | 1.58e-05 | 6.58e-04 |
| ncbi_114355056 | Integrase catalytic domain-containing protein, partial [Aphis craccivora]                     | -1.20 | 1.58e-07 | 1.34e-05 |
| ncbi_114355077 | cytochrome P450 4c3-like [Bicyclus anynana]                                                   | +2.07 | 1.18e-03 | 2.05e-02 |
| ncbi_114355216 | fat-like cadherin-related tumor suppressor homolog [Spodoptera litura]                        | -3.20 | 2.23e-03 | 3.28e-02 |
| ncbi_114355250 | uncharacterized protein LOC114355250, partial [Ostrinia furnacalis]                           | +1.99 | 1.45e-03 | 2.40e-02 |
| ncbi_114355297 | proton-coupled amino acid transporter-like protein pathetic [Ostrinia furnacalis]             | -1.30 | 2.05e-10 | 3.53e-08 |
| ncbi_114355428 | brefeldin A-inhibited guanine nucleotide-exchange protein 3 [Ostrinia furnacalis]             | +1.32 | 2.21e-04 | 5.60e-03 |
| ncbi_114355482 | PREDICTED: RNA-directed DNA polymerase from mobile element jockey-like [Amyelois transitella] | +3.66 | 3.87e-03 | 4.81e-02 |
| ncbi_114355646 | keratin-associated protein 19-2-like [Ostrinia furnacalis]                                    | -1.28 | 1.59e-08 | 1.86e-06 |
| ncbi_114355704 | activity-regulated cytoskeleton associated protein 1-like [Ostrinia furnacalis]               | -1.45 | 6.93e-04 | 1.36e-02 |
| ncbi_114355741 | Integrase catalytic domain-containing protein [Aphis craccivora]                              | -1.26 | 8.18e-06 | 3.86e-04 |
| ncbi_114355759 | proclotting enzyme-like isoform X2 [Ostrinia furnacalis]                                      | -1.34 | 2.11e-03 | 3.15e-02 |
| ncbi_114355779 | Retrovirus-related Pol polyprotein from transposon 297 [Eumeta japonica]                      | -4.77 | 5.65e-06 | 2.80e-04 |
| ncbi_114355827 | hemiceitin-1-like, partial [Ostrinia furnacalis]                                              | +2.68 | 5.05e-04 | 1.07e-02 |
| ncbi_114355931 | probable chitinase 2 isoform X1 [Ostrinia furnacalis]                                         | -1.48 | 9.52e-07 | 6.34e-05 |
| ncbi_114355974 | UPF0587 protein GA18326-like [Ostrinia furnacalis]                                            | +1.50 | 4.52e-05 | 1.58e-03 |
| ncbi_114355992 | Retrovirus-related Pol polyprotein from transposon 412 [Eumeta japonica]                      | +4.00 | 9.62e-10 | 1.42e-07 |
| ncbi_114356009 | glucose dehydrogenase [FAD, quinone]-like [Ostrinia furnacalis]                               | +1.12 | 1.80e-08 | 2.09e-06 |
| ncbi_114356174 | Zinc finger DNA binding protein [Operophtera brumata]                                         | -1.76 | 1.03e-07 | 9.21e-06 |
| ncbi_114356250 | PREDICTED: protein son of sevenless-like [Plutella xylostella]                                | -1.47 | 2.48e-03 | 3.50e-02 |
| ncbi_114356307 | prostatic acid phosphatase-like [Ostrinia furnacalis]                                         | -2.34 | 6.24e-25 | 6.53e-22 |
| ncbi_114356322 | tubulin polyglutamylase TTLL13-like [Ostrinia furnacalis]                                     | +9.06 | 4.34e-06 | 2.27e-04 |
| ncbi_114356422 | neurexin-4-like [Ostrinia furnacalis]                                                         | -1.56 | 7.85e-04 | 1.51e-02 |
| ncbi_114356497 | cytochrome P450 6B6-like [Ostrinia furnacalis]                                                | -1.15 | 6.96e-05 | 2.25e-03 |
| ncbi_114356560 | zinc finger HIT domain-containing protein 2 [Trichoplusia ni]                                 | -1.77 | 8.14e-04 | 1.55e-02 |

|                |                                                                                              |       |          |          |
|----------------|----------------------------------------------------------------------------------------------|-------|----------|----------|
| ncbi_114356609 | oxidative stress-responsive serine-rich protein 1 [Helicoverpa armigera]                     | -1.30 | 1.86e-03 | 2.91e-02 |
| ncbi_114356634 | PREDICTED: coiled-coil domain-containing protein 39 [Amyeloidis transitella]                 | +1.48 | 1.80e-04 | 4.74e-03 |
| ncbi_114356668 | histone-lysine N-methyltransferase 2D-like isoform X1 [Ostrinia furnacalis]                  | +1.01 | 7.05e-04 | 1.37e-02 |
| ncbi_114356845 | Cysteine string protein [Papilio xuthus]                                                     | -1.34 | 1.06e-05 | 4.78e-04 |
| ncbi_114356945 | zinc transporter ZIP1-like [Ostrinia furnacalis]                                             | +2.44 | 7.22e-05 | 2.30e-03 |
| ncbi_114357040 | PREDICTED: RNA-directed DNA polymerase from mobile element jockey-like [Acropora digitifera] | -5.11 | 1.08e-03 | 1.92e-02 |
| ncbi_114357150 | glutamate dehydrogenase, mitochondrial-like isoform X2 [Ostrinia furnacalis]                 | +1.80 | 3.42e-03 | 4.38e-02 |
| ncbi_114357213 | proto-oncogene tyrosine-protein kinase ROS [Ostrinia furnacalis]                             | -1.44 | 2.36e-03 | 3.40e-02 |
| ncbi_114357236 | zinc finger DNA binding protein [Danaus plexippus plexippus]                                 | -3.46 | 7.49e-12 | 1.80e-09 |
| ncbi_114357324 | secretory phospholipase A2 receptor-like [Ostrinia furnacalis]                               | -4.79 | 2.68e-03 | 3.71e-02 |
| ncbi_114357451 | organic cation transporter protein-like [Ostrinia furnacalis]                                | -1.68 | 4.00e-08 | 4.14e-06 |
| ncbi_114357458 | ATP-binding cassette sub-family A member 1-like [Ostrinia furnacalis]                        | -2.51 | 9.51e-04 | 1.74e-02 |
| ncbi_114357532 | alpha-crystallin B chain-like [Ostrinia furnacalis]                                          | +1.80 | 2.24e-11 | 4.95e-09 |
| ncbi_114357580 | trans-1,2-dihydrobenzene-1,2-diol dehydrogenase-like isoform X3 [Ostrinia furnacalis]        | +2.33 | 9.87e-04 | 1.80e-02 |
| ncbi_114357630 | Pogo transposable element with KRAB domain [Papilio machaon]                                 | -1.33 | 2.11e-03 | 3.15e-02 |
| ncbi_114357646 | trypsin, alkaline C-like [Ostrinia furnacalis]                                               | +3.04 | 8.62e-05 | 2.61e-03 |
| ncbi_114357736 | UDP-glucuronosyltransferase 2B14-like [Ostrinia furnacalis]                                  | +3.38 | 6.59e-05 | 2.16e-03 |
| ncbi_114357739 | UDP-glucuronosyltransferase 2B14-like isoform X1 [Ostrinia furnacalis]                       | +2.45 | 2.64e-04 | 6.40e-03 |
| ncbi_114357777 | cAMP and cAMP-inhibited cGMP 3',5'-cyclic phosphodiesterase 10A-like [Ostrinia furnacalis]   | -3.01 | 4.25e-04 | 9.45e-03 |
| ncbi_114357817 | xanthine dehydrogenase-like [Ostrinia furnacalis]                                            | -1.11 | 2.28e-04 | 5.73e-03 |
| ncbi_114357821 | cytochrome P450 6B6-like [Ostrinia furnacalis]                                               | -1.21 | 5.88e-04 | 1.20e-02 |
| ncbi_114357956 | DNA polymerase nu-like [Helicoverpa armigera]                                                | -5.57 | 6.79e-06 | 3.27e-04 |
| ncbi_114357981 | dual specificity protein phosphatase MPK-4-like isoform X2 [Ostrinia furnacalis]             | -1.66 | 5.74e-05 | 1.96e-03 |
| ncbi_114357991 | pancreatic triacylglycerol lipase-like isoform X1 [Ostrinia furnacalis]                      | -1.47 | 1.80e-05 | 7.36e-04 |
| ncbi_114358018 | Serine/threonine-protein phosphatase, partial [Aphis craccivora]                             | +3.05 | 3.11e-12 | 8.14e-10 |

|                |                                                                                  |       |          |          |
|----------------|----------------------------------------------------------------------------------|-------|----------|----------|
| ncbi_114358032 | sulfotransferase family cytosolic 1B member 1-like [Ostrinia furnacalis]         | +2.93 | 9.69e-52 | 3.72e-48 |
| ncbi_114358161 | zinc carboxypeptidase-like [Ostrinia furnacalis]                                 | -1.02 | 9.68e-09 | 1.20e-06 |
| ncbi_114358317 | reticulocyte-binding protein 2 homolog a-like [Bombyx mandarina]                 | -1.45 | 3.75e-03 | 4.70e-02 |
| ncbi_114358336 | LINE-1 reverse transcriptase homolog [Eumeta japonica]                           | -2.09 | 2.28e-04 | 5.74e-03 |
| ncbi_114358375 | phospholipase A-2-activating protein-like [Ostrinia furnacalis]                  | -1.10 | 1.78e-04 | 4.69e-03 |
| ncbi_114358448 | Endonuclease-reverse transcriptase [Operophtera brumata]                         | -3.40 | 2.87e-11 | 6.24e-09 |
| ncbi_114358491 | attacin-like [Ostrinia furnacalis]                                               | +4.32 | 8.36e-06 | 3.91e-04 |
| ncbi_114358539 | Zinc finger DNA binding protein [Operophtera brumata]                            | +1.54 | 4.57e-05 | 1.59e-03 |
| ncbi_114358601 | CLUMA_CG019058, isoform A [Clunio marinus]                                       | -1.74 | 1.81e-04 | 4.75e-03 |
| ncbi_114358643 | polyprotein [Antheraea mylitta]                                                  | +2.13 | 1.92e-07 | 1.58e-05 |
| ncbi_114358670 | ADP-ribose pyrophosphatase, mitochondrial isoform X1 [Ostrinia furnacalis]       | +1.06 | 6.36e-05 | 2.09e-03 |
| ncbi_114358690 | collagenase-like [Ostrinia furnacalis]                                           | +3.43 | 2.70e-12 | 7.23e-10 |
| ncbi_114358723 | collagenase-like [Ostrinia furnacalis]                                           | +2.85 | 1.01e-25 | 1.45e-22 |
| ncbi_114358734 | collagenase-like [Ostrinia furnacalis]                                           | +2.79 | 1.32e-08 | 1.60e-06 |
| ncbi_114358804 | chorion peroxidase isoform X1 [Ostrinia furnacalis]                              | +1.86 | 1.45e-04 | 3.94e-03 |
| ncbi_114358820 | ATP-dependent DNA helicase PIF1 [Eumeta japonica]                                | -2.49 | 1.73e-06 | 1.04e-04 |
| ncbi_114358859 | apoptosis-inducing factor 1, mitochondrial-like isoform X1 [Ostrinia furnacalis] | -2.92 | 4.00e-03 | 4.90e-02 |
| ncbi_114358879 | uncharacterized protein LOC114358879 [Ostrinia furnacalis]                       | +1.20 | 1.39e-03 | 2.33e-02 |
| ncbi_114358900 | protocadherin-like wing polarity protein stan [Ostrinia furnacalis]              | -1.32 | 3.18e-03 | 4.21e-02 |
| ncbi_114358964 | lipase 3-like [Ostrinia furnacalis]                                              | +2.88 | 3.39e-03 | 4.38e-02 |
| ncbi_114359044 | lysosomal-associated transmembrane protein 4A [Ostrinia furnacalis]              | -1.00 | 4.30e-08 | 4.38e-06 |
| ncbi_114359063 | prefoldin subunit 6 [Ostrinia furnacalis]                                        | -1.35 | 8.56e-05 | 2.60e-03 |
| ncbi_114359074 | carboxypeptidase B-like [Ostrinia furnacalis]                                    | +2.38 | 2.71e-21 | 2.08e-18 |
| ncbi_114359075 | uncharacterized protein LOC114359075 [Ostrinia furnacalis]                       | -1.36 | 1.39e-07 | 1.21e-05 |
| ncbi_114359077 | carboxypeptidase B-like [Ostrinia furnacalis]                                    | +1.88 | 1.29e-14 | 5.10e-12 |

|                |                                                                                     |        |          |          |
|----------------|-------------------------------------------------------------------------------------|--------|----------|----------|
| ncbi_114359099 | saccharopine dehydrogenase-like oxidoreductase [Ostrinia furnacalis]                | -3.11  | 5.26e-09 | 6.65e-07 |
| ncbi_114359315 | RNase H and integrase-like protein, partial [Bombyx mori]                           | +1.59  | 2.58e-03 | 3.61e-02 |
| ncbi_114359336 | polyprotein [Antheraea mylitta]                                                     | +1.25  | 8.09e-05 | 2.49e-03 |
| ncbi_114359575 | gustatory receptor 68a-like [Ostrinia furnacalis]                                   | +3.62  | 3.17e-03 | 4.19e-02 |
| ncbi_114359657 | shavenoid [Papilio xuthus]                                                          | -2.02  | 2.24e-03 | 3.29e-02 |
| ncbi_114359718 | PREDICTED: ankyrin repeat domain-containing protein 11-like [Plutella xylostella]   | -1.16  | 3.53e-03 | 4.49e-02 |
| ncbi_114359766 | zinc metalloproteinase nas-13-like [Ostrinia furnacalis]                            | +2.15  | 2.54e-20 | 1.62e-17 |
| ncbi_114359768 | astacin-like metalloprotease toxin 5 [Ostrinia furnacalis]                          | +1.20  | 1.30e-20 | 9.33e-18 |
| ncbi_114359791 | calsequestrin-1-like [Spodoptera litura]                                            | -4.24  | 1.70e-05 | 6.99e-04 |
| ncbi_114359798 | chymotrypsin-like elastase family member 2A [Ostrinia furnacalis]                   | +1.04  | 6.00e-06 | 2.94e-04 |
| ncbi_114359801 | collagenase-like [Ostrinia furnacalis]                                              | +1.81  | 2.32e-44 | 6.67e-41 |
| ncbi_114359847 | tektin-3-like isoform X1 [Ostrinia furnacalis]                                      | +5.35  | 2.72e-04 | 6.56e-03 |
| ncbi_114359850 | transport and Golgi organization protein 6 homolog isoform X1 [Ostrinia furnacalis] | -1.19  | 1.16e-03 | 2.03e-02 |
| ncbi_114360123 | short-chain dehydrogenase/reductase family 16C member 6 [Ostrinia furnacalis]       | -4.96  | 2.34e-07 | 1.90e-05 |
| ncbi_114360158 | NFATC2-interacting protein [Operophtera brumata]                                    | -1.09  | 5.24e-04 | 1.09e-02 |
| ncbi_114360241 | Retrovirus-related Pol polyprotein from transposon 17.6 [Araneus ventricosus]       | -1.33  | 7.58e-04 | 1.46e-02 |
| ncbi_114360250 | Integrase catalytic domain-containing protein, partial [Aphis craccivora]           | -2.20  | 1.59e-05 | 6.58e-04 |
| ncbi_114360251 | Gag-pol polyprotein [Operophtera brumata]                                           | -1.49  | 4.31e-06 | 2.27e-04 |
| ncbi_114360286 | Retrovirus-related Pol polyprotein from transposon 297 [Eumeta japonica]            | -10.16 | 2.57e-04 | 6.28e-03 |
| ncbi_114360434 | general transcription factor 3C polypeptide 4 isoform X2 [Cryptotermes secundus]    | -1.15  | 3.94e-03 | 4.87e-02 |
| ncbi_114360485 | Kv channel-interacting protein 4-like isoform X1 [Ostrinia furnacalis]              | -1.66  | 3.30e-04 | 7.64e-03 |
| ncbi_114360499 | trypsin, alkaline A-like [Ostrinia furnacalis]                                      | +10.93 | 3.86e-04 | 8.66e-03 |
| ncbi_114360549 | uncharacterized protein LOC114360549 [Ostrinia furnacalis]                          | -2.34  | 1.90e-10 | 3.36e-08 |
| ncbi_114360595 | Gag-Pol polyprotein [Folsomia candida]                                              | -1.34  | 3.33e-08 | 3.62e-06 |
| ncbi_114360773 | glutathione S-transferase 1-like [Ostrinia furnacalis]                              | +1.91  | 2.43e-03 | 3.46e-02 |

|                |                                                                                          |       |          |          |
|----------------|------------------------------------------------------------------------------------------|-------|----------|----------|
| ncbi_114360825 | calphotin-like [Ostrinia furnacalis]                                                     | -1.11 | 5.34e-05 | 1.83e-03 |
| ncbi_114360920 | lachesin-like [Ostrinia furnacalis]                                                      | -3.72 | 1.78e-03 | 2.82e-02 |
| ncbi_114360950 | ORF1p [Operophtera brumata]                                                              | -2.97 | 1.89e-08 | 2.18e-06 |
| ncbi_114360986 | Integrase catalytic domain-containing protein, partial [Aphis craccivora]                | -1.94 | 3.17e-03 | 4.20e-02 |
| ncbi_114361102 | high affinity copper uptake protein 1-like [Ostrinia furnacalis]                         | +2.02 | 6.98e-32 | 1.34e-28 |
| ncbi_114361117 | collagen alpha-1(III) chain-like [Ostrinia furnacalis]                                   | +1.67 | 1.87e-03 | 2.92e-02 |
| ncbi_114361122 | juvenile hormone esterase-like isoform X1 [Ostrinia furnacalis]                          | -1.96 | 1.74e-03 | 2.77e-02 |
| ncbi_114361130 | paired box protein Pax-1-like [Ostrinia furnacalis]                                      | +2.38 | 8.14e-04 | 1.55e-02 |
| ncbi_114361313 | Retrovirus-related Pol polyprotein from transposon TNT 1-94 [Papilio machaon]            | +1.67 | 1.88e-03 | 2.92e-02 |
| ncbi_114361498 | PREDICTED: RNA-directed DNA polymerase from mobile element jockey-like [Papilio machaon] | +1.22 | 3.20e-03 | 4.22e-02 |
| ncbi_114361500 | nephrin-like [Ostrinia furnacalis]                                                       | +1.05 | 1.27e-03 | 2.16e-02 |
| ncbi_114361507 | PREDICTED: probable salivary secreted peptide [Amyelois transitella]                     | +1.06 | 1.06e-13 | 3.48e-11 |
| ncbi_114361766 | myrosinase 1-like [Ostrinia furnacalis]                                                  | -1.20 | 4.62e-08 | 4.66e-06 |
| ncbi_114361845 | Lysocardiolipin acyltransferase 1, partial [Operophtera brumata]                         | -1.65 | 8.48e-04 | 1.60e-02 |
| ncbi_114362131 | PiggyBac transposable element-derived protein 3 [Eumeta japonica]                        | -2.21 | 1.23e-03 | 2.11e-02 |
| ncbi_114362146 | MADF domain-containing protein [Aphis craccivora]                                        | -1.28 | 3.57e-03 | 4.53e-02 |
| ncbi_114362322 | polyprotein [Antheraea mylitta]                                                          | -1.87 | 5.67e-06 | 2.80e-04 |
| ncbi_114362336 | tigger transposable element-derived protein 4-like isoform X1 [Ostrinia furnacalis]      | +4.30 | 3.84e-06 | 2.08e-04 |
| ncbi_114362420 | acetylcholinesterase-like [Ostrinia furnacalis]                                          | +1.55 | 2.82e-04 | 6.75e-03 |
| ncbi_114362457 | tyrosine-protein phosphatase non-receptor type 13-like [Ostrinia furnacalis]             | -1.27 | 1.05e-03 | 1.88e-02 |
| ncbi_114362479 | uncharacterized protein LOC114362479 [Ostrinia furnacalis]                               | +3.30 | 2.66e-03 | 3.68e-02 |
| ncbi_114362482 | Pro-Pol polyprotein [Folsomia candida]                                                   | +4.56 | 3.96e-07 | 2.98e-05 |
| ncbi_114362538 | chymotrypsin BI-like [Ostrinia furnacalis]                                               | +4.55 | 1.91e-14 | 7.33e-12 |
| ncbi_114362546 | piggyBac transposable element-derived protein 1-like, partial [Spodoptera litura]        | -5.81 | 1.02e-11 | 2.36e-09 |
| ncbi_114362577 | formin-like protein 14 [Vanessa tameamea]                                                | +1.81 | 4.32e-06 | 2.27e-04 |

|                |                                                                                        |       |          |          |
|----------------|----------------------------------------------------------------------------------------|-------|----------|----------|
| ncbi_114362585 | uncharacterized protein LOC114362585 [Ostrinia furnacalis]                             | -9.42 | 2.52e-03 | 3.55e-02 |
| ncbi_114362672 | ATP-dependent DNA helicase PIF1 [Eumeta japonica]                                      | -1.84 | 3.52e-06 | 1.94e-04 |
| ncbi_114362710 | membrane-bound alkaline phosphatase-like [Ostrinia furnacalis]                         | -1.37 | 1.31e-05 | 5.77e-04 |
| ncbi_114362735 | janus kinase and microtubule-interacting protein 1-like [Ostrinia furnacalis]          | -2.51 | 1.44e-03 | 2.39e-02 |
| ncbi_114362757 | polyprotein [Mizuhopecten yessoensis]                                                  | -1.37 | 3.67e-04 | 8.29e-03 |
| ncbi_114362872 | alpha-amylase 2-like isoform X3 [Ostrinia furnacalis]                                  | -1.91 | 6.25e-14 | 2.25e-11 |
| ncbi_114363023 | ATP-dependent DNA helicase PIF1 [Eumeta japonica]                                      | -2.64 | 2.08e-11 | 4.68e-09 |
| ncbi_114363240 | trypsin theta-like isoform X1 [Ostrinia furnacalis]                                    | +1.15 | 8.63e-11 | 1.65e-08 |
| ncbi_114363286 | proteoglycan 4-like [Ostrinia furnacalis]                                              | -1.94 | 1.45e-20 | 9.84e-18 |
| ncbi_114363287 | P94 protein [Danaus plexippus plexippus]                                               | -1.68 | 5.27e-12 | 1.32e-09 |
| ncbi_114363298 | Fanconi anemia group D2 protein [Ostrinia furnacalis]                                  | -1.55 | 2.58e-12 | 7.07e-10 |
| ncbi_114363342 | Integrase catalytic domain-containing protein, partial [Aphis craccivora]              | -1.09 | 8.75e-06 | 4.06e-04 |
| ncbi_114363457 | uncharacterized protein LOC114363457 isoform X1 [Ostrinia furnacalis]                  | -3.25 | 1.85e-05 | 7.53e-04 |
| ncbi_114363590 | keratin, type II cytoskeletal 2 epidermal-like [Ostrinia furnacalis]                   | -2.44 | 2.14e-06 | 1.26e-04 |
| ncbi_114363699 | uncharacterized protein LOC114363699 [Ostrinia furnacalis]                             | +9.86 | 7.57e-05 | 2.37e-03 |
| ncbi_114363785 | myosin-9-like [Ostrinia furnacalis]                                                    | -3.65 | 2.32e-08 | 2.61e-06 |
| ncbi_114363829 | CLUMA_CG003690, isoform A [Clunio marinus]                                             | +3.75 | 2.42e-03 | 3.46e-02 |
| ncbi_114363830 | structural maintenance of chromosomes protein 3-like isoform x2 protein [Lasius niger] | +4.69 | 1.62e-03 | 2.61e-02 |
| ncbi_114363843 | Integrase catalytic domain-containing protein [Aphis craccivora]                       | +3.42 | 3.83e-05 | 1.38e-03 |
| ncbi_114363909 | cell cycle checkpoint protein RAD1 isoform X1 [Ostrinia furnacalis]                    | +1.31 | 1.19e-03 | 2.07e-02 |
| ncbi_114364123 | transposase, partial [Helicoverpa zea]                                                 | -1.42 | 5.18e-07 | 3.77e-05 |
| ncbi_114364375 | 3-ketoacyl-CoA thiolase, mitochondrial-like [Ostrinia furnacalis]                      | -1.51 | 6.92e-17 | 3.62e-14 |
| ncbi_114364384 | probable protein BRICK1-A [Bombyx mori]                                                | +1.04 | 7.06e-11 | 1.40e-08 |
| ncbi_114364477 | proton-coupled amino acid transporter-like protein CG1139 [Ostrinia furnacalis]        | -1.25 | 9.95e-05 | 2.91e-03 |
| ncbi_114364789 | Si:dkey-56d12.4 protein [Operophtera brumata]                                          | -1.12 | 9.20e-04 | 1.70e-02 |

|                |                                                                                |       |           |           |
|----------------|--------------------------------------------------------------------------------|-------|-----------|-----------|
| ncbi_114364874 | probable cytochrome P450 304a1 [Ostrinia furnacalis]                           | -1.19 | 3.23e-04  | 7.51e-03  |
| ncbi_114364949 | forkhead box protein J1-A-like [Ostrinia furnacalis]                           | -2.60 | 6.81e-04  | 1.34e-02  |
| ncbi_114365248 | glycine-rich cell wall structural protein-like [Ostrinia furnacalis]           | -2.77 | 1.79e-03  | 2.83e-02  |
| ncbi_114365282 | cytochrome P450 6B5-like [Ostrinia furnacalis]                                 | -1.54 | 8.62e-11  | 1.65e-08  |
| ncbi_114365306 | polyprotein [Antheraea mylitta]                                                | +6.60 | 5.04e-237 | 5.80e-233 |
| ncbi_114365322 | cis, cis-muconate transporter protein [Bombyx mori]                            | -3.42 | 2.43e-03  | 3.46e-02  |
| ncbi_114365341 | glutathione S-transferase-like [Ostrinia furnacalis]                           | -1.66 | 9.05e-14  | 3.11e-11  |
| ncbi_114365395 | multiple inositol polyphosphate phosphatase 1-like [Ostrinia furnacalis]       | +8.65 | 2.86e-05  | 1.09e-03  |
| ncbi_114365409 | G2/M phase-specific E3 ubiquitin-protein ligase [Bombyx mori]                  | -1.54 | 5.17e-04  | 1.08e-02  |
| ncbi_114365566 | fasciclin-2-like [Ostrinia furnacalis]                                         | +3.72 | 2.49e-03  | 3.50e-02  |
| ncbi_114365597 | cysteine synthase-like [Ostrinia furnacalis]                                   | -1.85 | 4.10e-28  | 6.74e-25  |
| ncbi_114365702 | chymotrypsin-1-like [Ostrinia furnacalis]                                      | +3.47 | 8.53e-17  | 4.27e-14  |
| ncbi_114365712 | NICE-3 family member [Aedes aegypti]                                           | +1.02 | 1.13e-04  | 3.24e-03  |
| ncbi_114365715 | alpha-2-macroglobulin-like protein 1 [Ostrinia furnacalis]                     | -2.94 | 3.33e-06  | 1.85e-04  |
| ncbi_114365747 | uncharacterized protein LOC114365747 [Ostrinia furnacalis]                     | -1.25 | 1.42e-05  | 6.09e-04  |
| ncbi_114365855 | elongation of very long chain fatty acids protein 4-like [Ostrinia furnacalis] | -2.37 | 1.29e-03  | 2.19e-02  |
| ncbi_114365912 | uncharacterized protein LOC114365912 [Ostrinia furnacalis]                     | +7.11 | 1.13e-07  | 9.97e-06  |
| ncbi_114366090 | fructose-bisphosphate aldolase-like [Ostrinia furnacalis]                      | -1.55 | 6.05e-04  | 1.22e-02  |
| ncbi_114366113 | organic cation transporter-like protein [Ostrinia furnacalis]                  | -1.51 | 1.49e-05  | 6.32e-04  |
| ncbi_114366264 | angiotensin-converting enzyme-like [Ostrinia furnacalis]                       | +1.91 | 7.61e-06  | 3.62e-04  |
| ncbi_114366439 | Ecdysteroid 22-kinase [Operophtera brumata]                                    | -1.56 | 1.42e-06  | 8.89e-05  |
| ncbi_114366528 | piggyBac transposable element-derived protein 2-like [Trichoplusia ni]         | -1.36 | 3.37e-05  | 1.25e-03  |
| ncbi_114366552 | pupal cuticle protein 36-like [Ostrinia furnacalis]                            | +2.08 | 1.57e-03  | 2.55e-02  |
| ncbi_114366668 | UDP-glucuronosyltransferase 2B1-like isoform X3 [Ostrinia furnacalis]          | -1.35 | 2.46e-04  | 6.12e-03  |
| ncbi_114366672 | beta-1,3-glucan-binding protein-like isoform X1 [Ostrinia furnacalis]          | -1.86 | 4.22e-04  | 9.40e-03  |

|                |                                                                       |       |          |          |
|----------------|-----------------------------------------------------------------------|-------|----------|----------|
| ncbi_114366725 | X-ray repair cross-complementing protein 5-like [Ostrinia furnacalis] | -1.17 | 1.59e-08 | 1.86e-06 |
| ncbi_114366797 | zinc transporter 7-like isoform X1 [Ostrinia furnacalis]              | +1.81 | 8.55e-05 | 2.60e-03 |



**Table S6 Transcript data about heat shock protein, and P-Value $\leq$ 0.05.**

| Gene ID                   | Description                                                    | log2(fc) | P-Value  | FDR      |
|---------------------------|----------------------------------------------------------------|----------|----------|----------|
| <b>ACB-BtS vs.ACB-FR</b>  |                                                                |          |          |          |
| ncbi_114354725            | heat shock protein 68-like [Ostrinia furnacalis]               | -3.26    | 3.00e-08 | 3.26e-06 |
| ncbi_114363773            | heat shock protein 68-like [Ostrinia furnacalis]               | -2.90    | 1.37e-03 | 1.61e-02 |
| ncbi_114361580            | heat shock protein Hsp-12.2-like [Ostrinia furnacalis]         | -2.85    | 3.41e-30 | 2.01e-26 |
| ncbi_114354259            | heat shock protein 68-like [Ostrinia furnacalis]               | -2.32    | 6.31e-16 | 5.31e-13 |
| ncbi_114356221            | heat shock protein 68-like [Ostrinia furnacalis]               | -1.56    | 2.53e-15 | 1.57e-12 |
| ncbi_114356220            | heat shock protein 83 [Ostrinia furnacalis]                    | +0.25    | 1.75e-02 | 1.03e-01 |
| ncbi_114358080            | heat shock protein 30C isoform X1 [Helicoverpa armigera]       | +0.34    | 2.51e-02 | 1.34e-01 |
| ncbi_114362461            | heat shock protein 60A-like [Ostrinia furnacalis]              | +0.61    | 6.39e-07 | 3.95e-05 |
| ncbi_114365590            | 10 kDa heat shock protein, mitochondrial [Ostrinia furnacalis] | +0.67    | 3.13e-05 | 8.81e-04 |
| <b>ACB-BtS vs.ACB-IeR</b> |                                                                |          |          |          |
| ncbi_114365089            | heat shock protein 75 kDa, mitochondrial [Ostrinia furnacalis] | -0.40    | 3.92e-02 | 2.25e-01 |
| ncbi_114362461            | heat shock protein 60A-like [Ostrinia furnacalis]              | +0.29    | 2.78e-03 | 3.79e-02 |
| ncbi_114365590            | 10 kDa heat shock protein, mitochondrial [Ostrinia furnacalis] | +0.57    | 6.38e-07 | 4.56e-05 |

**Table S7 Transcript data about UDP-glucuronosyltransferase, and P-Value≤0.05.**

| Gene ID                   | Description                                                            | log2(fc) | P-Value  | FDR      |
|---------------------------|------------------------------------------------------------------------|----------|----------|----------|
| <b>ACB-BtS vs.ACB-FR</b>  |                                                                        |          |          |          |
| ncbi_114360717            | UDP-glucuronosyltransferase 2B20-like [Ostrinia furnacalis]            | -1.34    | 8.69e-03 | 6.24e-02 |
| ncbi_114366668            | UDP-glucuronosyltransferase 2B1-like isoform X3 [Ostrinia furnacalis]  | -0.84    | 1.01e-02 | 6.99e-02 |
| ncbi_114365422            | UDP-glucuronosyltransferase 2B1-like [Ostrinia furnacalis]             | -0.68    | 2.39e-05 | 7.22e-04 |
| ncbi_114350603            | UDP-glucuronosyltransferase 1-6 [Habropoda laboriosa]                  | -0.44    | 1.60e-02 | 9.70e-02 |
| ncbi_114350074            | UDP-glucuronosyltransferase 2B10-like [Ostrinia furnacalis]            | -0.43    | 2.44e-02 | 1.31e-01 |
| ncbi_114353020            | UDP-glucuronosyltransferase 1-7C-like isoform X1 [Ostrinia furnacalis] | +0.33    | 4.14e-03 | 3.63e-02 |
| ncbi_114366667            | UDP-glucuronosyltransferase 2B1-like isoform X1 [Ostrinia furnacalis]  | +0.40    | 3.11e-04 | 5.25e-03 |
| ncbi_114357098            | UDP-glucuronosyltransferase 2B15-like [Ostrinia furnacalis]            | +0.41    | 3.07e-04 | 5.21e-03 |
| ncbi_114358977            | UDP-glucuronosyltransferase 2B1-like [Ostrinia furnacalis]             | +0.53    | 6.45e-03 | 4.99e-02 |
| ncbi_114357101            | UDP-glucuronosyltransferase 2B15-like isoform X1 [Ostrinia furnacalis] | +0.63    | 2.08e-02 | 1.17e-01 |
| ncbi_114357080            | UDP-glucuronosyltransferase 2B2-like [Ostrinia furnacalis]             | +0.65    | 1.56e-04 | 3.18e-03 |
| ncbi_114358082            | UDP-glucuronosyltransferase 3A1-like [Ostrinia furnacalis]             | +0.77    | 1.87e-09 | 2.86e-07 |
| ncbi_114350056            | UDP-glucuronosyltransferase 2B1-like [Ostrinia furnacalis]             | +0.88    | 2.64e-10 | 4.93e-08 |
| ncbi_114352649            | UDP-glucuronosyltransferase 2B20-like isoform X1 [Vanessa tameamea]    | +0.92    | 1.99e-04 | 3.79e-03 |
| ncbi_114357102            | UDP-glucuronosyltransferase 2B15-like [Ostrinia furnacalis]            | +0.93    | 7.74e-04 | 1.04e-02 |
| ncbi_114364052            | UDP-glucuronosyltransferase 2B30-like [Ostrinia furnacalis]            | +0.96    | 3.73e-05 | 1.02e-03 |
| ncbi_114366669            | UDP-glucuronosyltransferase 2B2-like [Ostrinia furnacalis]             | +1.30    | 6.26e-06 | 2.47e-04 |
| ncbi_114357739            | UDP-glucuronosyltransferase 2B14-like isoform X1 [Ostrinia furnacalis] | +1.62    | 4.99e-02 | 2.10e-01 |
| MSTRG.14142               | UDP-glucuronosyltransferase 2B15-like [Ostrinia furnacalis]            | +2.31    | 1.05e-15 | 8.21e-13 |
| ncbi_114352631            | UDP-glucuronosyltransferase 2B15-like [Ostrinia furnacalis]            | +7.07    | 2.98e-07 | 2.10e-05 |
| <b>ACB-BtS vs.ACB-IeR</b> |                                                                        |          |          |          |

|                |                                                                                |       |          |          |
|----------------|--------------------------------------------------------------------------------|-------|----------|----------|
| MSTRG.14142    | UDP-glucuronosyltransferase 2B15-like [ <i>Ostrinia furnacalis</i> ]           | -1.35 | 2.46e-04 | 6.12e-03 |
| ncbi_114364052 | UDP-glucuronosyltransferase 2B30-like [ <i>Ostrinia furnacalis</i> ]           | -0.68 | 5.38e-03 | 6.09e-02 |
| ncbi_114357098 | UDP-glucuronosyltransferase 2B15-like [ <i>Ostrinia furnacalis</i> ]           | -0.54 | 1.46e-02 | 1.21e-01 |
| ncbi_114350603 | UDP-glucuronosyltransferase 1-6 [ <i>Habropoda laboriosa</i> ]                 | -0.40 | 2.03e-02 | 1.48e-01 |
| ncbi_114366668 | UDP-glucuronosyltransferase 2B1-like isoform X3 [ <i>Ostrinia furnacalis</i> ] | +0.37 | 2.94e-03 | 3.96e-02 |
| ncbi_114350056 | UDP-glucuronosyltransferase 2B1-like [ <i>Ostrinia furnacalis</i> ]            | +0.92 | 7.28e-13 | 2.09e-10 |
| ncbi_114360717 | UDP-glucuronosyltransferase 2B20-like [ <i>Ostrinia furnacalis</i> ]           | +1.44 | 9.59e-07 | 6.34e-05 |
| ncbi_114358082 | UDP-glucuronosyltransferase 3A1-like [ <i>Ostrinia furnacalis</i> ]            | +2.45 | 2.64e-04 | 6.40e-03 |
| ncbi_114357736 | UDP-glucuronosyltransferase 2B14-like [ <i>Ostrinia furnacalis</i> ]           | +3.38 | 6.59e-05 | 2.16e-03 |

**Table S8 Transcript data about trypsin alkaline C-like, and P-Value $\leq$ 0.05.**

| Gene ID                   | Description                                               | log2(fc) | P-Value  | FDR      |
|---------------------------|-----------------------------------------------------------|----------|----------|----------|
| <b>ACB-BtS vs.ACB-FR</b>  |                                                           |          |          |          |
| ncbi_114351933            | trypsin, alkaline C-like [Ostrinia furnacalis]            | +2.54    | 2.68e-04 | 4.76e-03 |
| ncbi_114351935            | trypsin, alkaline C-like [Ostrinia furnacalis]            | +1.33    | 2.86e-08 | 3.15e-06 |
| ncbi_114351936            | trypsin, alkaline C-like isoform X1 [Ostrinia furnacalis] | +1.29    | 1.64e-07 | 1.33e-05 |
| ncbi_114355419            | trypsin, alkaline C-like [Ostrinia furnacalis]            | +0.57    | 8.74e-03 | 6.26e-02 |
| ncbi_114355420            | trypsin, alkaline C-like [Ostrinia furnacalis]            | +0.36    | 3.31e-02 | 1.60e-01 |
| <b>ACB-BtS vs.ACB-IeR</b> |                                                           |          |          |          |
| ncbi_114351933            | trypsin, alkaline C-like [Ostrinia furnacalis]            | +2.07    | 3.67e-02 | 2.15e-01 |
| ncbi_114351935            | trypsin, alkaline C-like [Ostrinia furnacalis]            | +1.79    | 1.14e-04 | 3.27e-03 |
| ncbi_114351936            | trypsin, alkaline C-like isoform X1 [Ostrinia furnacalis] | +2.95    | 5.85e-11 | 1.20e-08 |
| ncbi_114351939            | trypsin, alkaline C-like [Ostrinia furnacalis]            | +3.04    | 8.62e-05 | 2.61e-03 |
| ncbi_114355419            | trypsin, alkaline C-like [Ostrinia furnacalis]            | +0.77    | 6.51e-04 | 1.29e-02 |
| ncbi_114355420            | trypsin, alkaline C-like [Ostrinia furnacalis]            | +2.08    | 2.11e-23 | 2.03e-20 |
| ncbi_114355467            | trypsin, alkaline C-like [Ostrinia furnacalis]            | +0.17    | 1.62e-02 | 1.29e-01 |

**Table S9 Transcript data about glutathione S-transferase, and P-Value $\leq$ 0.05.**

| Gene ID                   | Description                                                                                  | log2(fc) | P-Value  | FDR      |
|---------------------------|----------------------------------------------------------------------------------------------|----------|----------|----------|
| <b>ACB-BtS vs.ACB-FR</b>  |                                                                                              |          |          |          |
| ncbi_114365341            | glutathione S-transferase-like [Ostrinia furnacalis]                                         | -1.33    | 1.55e-06 | 7.81e-05 |
| ncbi_114357527            | glutathione S-transferase theta-1-like [Ostrinia furnacalis]                                 | +0.34    | 8.87e-04 | 1.16e-02 |
| ncbi_114358125            | glutathione S-transferase omega-1-like [Ostrinia furnacalis]                                 | +0.24    | 1.58e-02 | 9.59e-02 |
| ncbi_114360536            | glutathione S-transferase C-terminal domain-containing protein homolog [Ostrinia furnacalis] | +0.87    | 9.29e-03 | 6.53e-02 |
| ncbi_114360773            | glutathione S-transferase 1-like [Ostrinia furnacalis]                                       | +2.75    | 1.46e-13 | 8.12e-11 |
| ncbi_114363146            | glutathione S-transferase 1-like [Ostrinia furnacalis]                                       | -0.84    | 4.24e-04 | 6.64e-03 |
| ncbi_114359748            | glutathione S-transferase 1-1-like [Ostrinia furnacalis]                                     | +0.38    | 5.01e-03 | 4.14e-02 |
| <b>ACB-BtS vs.ACB-IeR</b> |                                                                                              |          |          |          |
| ncbi_114365341            | glutathione S-transferase-like [Ostrinia furnacalis]                                         | -1.66    | 9.05e-14 | 3.11e-11 |
| ncbi_114364484            | glutathione S-transferase 2-like [Ostrinia furnacalis]                                       | -0.66    | 2.12e-03 | 3.16e-02 |
| MSTRG.22972               | glutathione S-transferase 1-like [Ostrinia furnacalis]                                       | +1.91    | 2.43e-03 | 3.46e-02 |
| ncbi_114358125            | glutathione S-transferase 1-like [Ostrinia furnacalis]                                       | +0.27    | 1.74e-02 | 1.34e-01 |
| ncbi_114365321            | glutathione S-transferase 1-like [Ostrinia furnacalis]                                       | -0.98    | 1.97e-03 | 3.00e-02 |
